# Supplementary material for: Triple therapy in the management of chronic obstructive pulmonary disease: systematic review and meta-analysis
Source: PubMed Central journal article supplement — BMJ. 2018 Nov 6;363:k4388. doi: 10.1136/bmj.k4388 (PMC6218838; doi:10.1136/bmj.k4388), 2018-11-06

## Supplementary appendix

| <b>Contents</b>                                                                                                          | <b>Page</b> |
|--------------------------------------------------------------------------------------------------------------------------|-------------|
| eAppendix A. Search strategies                                                                                           | Page 1      |
| eTable 1. Characteristics of studies evaluating triple inhaled therapy                                                   | Page 2-4    |
| eTable 2. Studies excluded after full-text review                                                                        | Page 5-8    |
| eTable 3. Subgroup analysis by duration                                                                                  | Page 9      |
| eTable 4. Subgroup analysis by eosinophil level                                                                          | Page 10     |
| eTable 5. Sensitivity analyses                                                                                           | Page 11     |
| eFigure 1. Association of triple therapy with moderate or severe exacerbations                                           | Page 12-14  |
| eFigure 2. Association of triple therapy with rate of severe exacerbations, all cause death, trough FEV1, and SGRQ score | Page 15-18  |
| eFigure 3. Association of triple therapy with AEs                                                                        | Page 19     |
| eFigure 4. Association of triple therapy with SAEs                                                                       | Page 20     |
| eFigure 5. Association of triple therapy with cardiovascular events                                                      | Page 21     |
| eFigure 6. Association of triple therapy with pneumonia events                                                           | Page 22     |
| eFigure 7. Funnel plot of the included studies                                                                           | Page 23-30  |

## **eAppendix A. Search strategies**

### **Search strategy of Pubmed**

#1 (COPD OR COAD OR COBD OR AECOPD OR emphysema OR "Chronic Obstructive Airway Disease" OR "Chronic obstructive pulmonary disease")

#2 (muscarinic OR LAMA OR tiotropium OR Spiriva OR glycopyrronium OR NVA237 OR Seebri OR umeclidinium OR GSK573719 OR Incruse OR aclidinium OR LAS34273 OR Turdorza OR Eklira)

#3 ((long\* NEAR beta\* NEAR agonist\*) OR LABA OR salmeterol OR \*formoterol OR indacaterol OR QAB149 OR vilanterol OR GW642444 OR olodaterol)

#4 ((inhal\* NEAR corticosteroid\*) OR ICS OR fluticasone OR budesonide OR beclomethasone OR ciclesonide OR flunisolid OR mometasone OR triamcinolone)

#5 (Ultibro OR QVA149 OR Stiolto OR Anoro)

#6 (Symbicort OR Viani OR Seretide OR Advair OR Atmadisc OR Adoair OR Foster OR Fostair OR Inuvair OR Dulera OR Flutiform OR Breo)

#7 #1 AND ((#2 AND #3 AND #4) OR (#2 AND #6) OR (#4 AND #5))

This strategy is adapted to identify trials in other electronic databases

**eTable 1 Patient inclusion criteria of included trials**

| Study        | Inclusion criteria                                                                                                                                                                                                                                                                                                                                                                                                                                                                                                                                                                                           |
|--------------|--------------------------------------------------------------------------------------------------------------------------------------------------------------------------------------------------------------------------------------------------------------------------------------------------------------------------------------------------------------------------------------------------------------------------------------------------------------------------------------------------------------------------------------------------------------------------------------------------------------|
| Aaron 2007   | <ul style="list-style-type: none"> <li>● At least 1 exacerbation of COPD that required treatment with systemic steroids or antibiotics within the 12 months before randomisation;</li> <li>● Age older than 35 years;</li> <li>● History of 10 or more pack-years of cigarette smoking;</li> <li>● Documented chronic airflow obstruction, with an FEV1/FVC ratio &lt; 0.70 and a post-bronchodilator FEV1 &lt; 65% of predicted value</li> </ul>                                                                                                                                                            |
| Bremner 2018 | <ul style="list-style-type: none"> <li>● Aged ≥40 years with COPD and who were current/ former smokers with a ≥ 10-pack-year smoking history were eligible for enrollment</li> <li>● COPD Assessment Test™ (CAT) score ≥ 10;</li> <li>● A post-albuterol/salbutamol FEV1/FVC ratio &lt; 0.70;</li> <li>● A post-bronchodilator FEV1 &lt; 50% of predicted and ≥1 moderate/severe exacerbation in the previous 12 months or a post-bronchodilator FEV1 ≥ 50% to &lt; 80% of predicted and ≥2 moderate exacerbations or ≥1 severe exacerbation requiring hospitalization in the previous 12 months.</li> </ul> |
| Cazzola 2007 | <ul style="list-style-type: none"> <li>● 50 years of age or older</li> <li>● current or former smokers with a 20 pack-year or more history.</li> <li>● baseline FEV1 of less than 50% of predicted, and a post-bronchodilator FEV1/ FVC less than 70%</li> </ul>                                                                                                                                                                                                                                                                                                                                             |
| Frith 2015   | <ul style="list-style-type: none"> <li>● 40 years of age or older with Moderate to Severe COPD (Stage II or Stage III) according to the GOLD 2010 guideline</li> <li>● Current or ex-smokers who have a smoking history of at least 10 pack years</li> <li>● Qualifying FEV1 at Visit 2 (day -7)</li> </ul>                                                                                                                                                                                                                                                                                                  |
| Hoshino 2011 | <ul style="list-style-type: none"> <li>● post-bronchodilator FEV1/FVC &lt; 0.7</li> <li>● a smoking history of &gt;10 pack-years, and no history of asthma, or atopy as defined by a positive skin prick test to one or more common allergens.</li> </ul>                                                                                                                                                                                                                                                                                                                                                    |
| Hoshino 2013 | <ul style="list-style-type: none"> <li>● &gt;40 years of age with a diagnosis of COPD,</li> <li>● a cigarette smoking history &gt;10 pack-years,</li> <li>● a postbronchodilator FEV 1 &lt;70% of the predicted value and ratio of FEV 1 to forced vital capacity (FVC) &lt;0.70.</li> </ul>                                                                                                                                                                                                                                                                                                                 |
| Hanania 2012 | <ul style="list-style-type: none"> <li>● 40 years of age or older with COPD diagnosis</li> <li>● At least 10 pack year smoking history</li> <li>● Post-albuterol FEV1 greater than or equal to 40% to less than or equal to 80% of predicted normal</li> <li>● An FEV1/FVC ratio of less than or equal to 0.70</li> </ul>                                                                                                                                                                                                                                                                                    |
| Jung 2012    | <ul style="list-style-type: none"> <li>● Had a postbronchodilator FEV1/FVC ratio of less than 0.70 and FEV1 of less than 65% of the predicted value in the past 1 year or at screening;</li> <li>● 40-80 years of age and had a smoking history of at least 10 pack-years.</li> </ul>                                                                                                                                                                                                                                                                                                                        |
| Lee 2016     | <ul style="list-style-type: none"> <li>● Aged ≥40 years;</li> <li>● A diagnosis of COPD with symptoms for &gt;2 years;</li> <li>● A history of ≥1 COPD exacerbation requiring a course of oral steroids and/or antibiotics within 1–12 months;</li> </ul>                                                                                                                                                                                                                                                                                                                                                    |

|              |                                                                                                                                                                                                                                                                                                                                                                                                                                                                                                                                                                                                                                                                                                                                                                                                                                                                                                                                                                                                                                                                                                                                                                                                                   |
|--------------|-------------------------------------------------------------------------------------------------------------------------------------------------------------------------------------------------------------------------------------------------------------------------------------------------------------------------------------------------------------------------------------------------------------------------------------------------------------------------------------------------------------------------------------------------------------------------------------------------------------------------------------------------------------------------------------------------------------------------------------------------------------------------------------------------------------------------------------------------------------------------------------------------------------------------------------------------------------------------------------------------------------------------------------------------------------------------------------------------------------------------------------------------------------------------------------------------------------------|
|              | <ul style="list-style-type: none"> <li>● A current or prior smoking history of <math>\geq 10</math> pack-years;</li> <li>● Pre-bronchodilator FEV1 <math>\leq 50\%</math> of predicted normal;</li> <li>● Pre-bronchodilator FEV1/FVC <math>&lt; 70\%</math>.</li> </ul>                                                                                                                                                                                                                                                                                                                                                                                                                                                                                                                                                                                                                                                                                                                                                                                                                                                                                                                                          |
| Lipson 2017  | <ul style="list-style-type: none"> <li>● Aged <math>\geq 40</math> years defined as GOLD Group D</li> <li>● FEV1 <math>&lt; 50\%</math> and COPD Assessment is Test TM <math>\geq 10</math>,</li> <li>● Patients with FEV1 <math>\geq 50</math>–<math>&lt; 80\%</math> and COPD Assessment Test TM <math>\geq 10</math>, and either <math>\geq 2</math> moderate exacerbations in the past year or <math>\geq 1</math> severe exacerbation in the past year.</li> </ul>                                                                                                                                                                                                                                                                                                                                                                                                                                                                                                                                                                                                                                                                                                                                           |
| Lipson 2018  | <ul style="list-style-type: none"> <li>● 40 years of age or older and had symptomatic COPD</li> <li>● Have either a FEV1 <math>&lt; 50\%</math> of the predicted normal value and a history of at least one moderate or severe exacerbation in the previous year, or an FEV1 of 50 to 80% of the predicted normal value and at least two moderate exacerbations or one severe exacerbation in the previous year.</li> </ul>                                                                                                                                                                                                                                                                                                                                                                                                                                                                                                                                                                                                                                                                                                                                                                                       |
| Maltais 2013 | <ul style="list-style-type: none"> <li>● aged <math>\geq 40</math> years and had a documented clinical history of COPD.</li> <li>● FEV1 post-albuterol/salbutamol at least 30 to no more than 80% of predicted normal and FEV1/FVC ratio post-albuterol/salbutamol of no more than 0.70</li> <li>● A history of smoking at least 10 pack-yr is required.</li> </ul>                                                                                                                                                                                                                                                                                                                                                                                                                                                                                                                                                                                                                                                                                                                                                                                                                                               |
| Papi 2018    | <ul style="list-style-type: none"> <li>● Male and female <math>\geq 40</math> years</li> <li>● Severe or very severe COPD diagnosed for at least 12 months</li> <li>● Current smokers or ex-smokers who quit smoking at least 6 months prior to screening visit, with a smoking history of at least 10 pack years Post-bronchodilator FEV1 <math>&lt; 50\%</math> of the predicted normal value and a post-bronchodilator FEV1/FVC ratio <math>&lt; 0.7</math></li> <li>● Documented history of at least one exacerbation in the 12 months</li> <li>● Patient under double therapy for at least 2 months prior to screening. Double therapy will be defined by treatment with any of the following: Orally inhaled corticosteroid (ICS) and (long-acting beta2-agonist) LABA ICS and long-acting muscarinic antagonist (LAMA) Orally LABA and LAMA monotherapy with LAMA for at least 2 months prior to screening</li> <li>● Symptomatic patient at screening with a CAT score <math>\geq 10</math>.</li> <li>● Cooperative attitude and ability to use correctly the inhalers, the spacer AeroChamber Plus (only to patients who are using a spacer), the electronic devices with COPD questionnaire.</li> </ul> |
| Siler 2015-S | <ul style="list-style-type: none"> <li>● 40 years of age or older had an established history of COPD;</li> <li>● Current or former cigarette smoker with a smoking history of 10 pack-years or more;</li> <li>● A pre- and post-salbutamol (albuterol) FEV 1 /FVC <math>&lt; 0.70</math> and a post-albuterol FEV 1 of 70% of predicted normal values or less ;</li> <li>● A score of 2 or higher on the modified Medical Research Council Dyspnea Scale at study Visit 1.</li> </ul>                                                                                                                                                                                                                                                                                                                                                                                                                                                                                                                                                                                                                                                                                                                             |
| Siler 2015-V | <ul style="list-style-type: none"> <li>● 40 years of age or older had an established history of COPD;</li> <li>● Current or former cigarette smoker with a smoking history of 10 pack-years or more;</li> <li>● A pre- and post-salbutamol (albuterol) FEV 1 /FVC <math>&lt; 0.70</math> and a post-albuterol FEV 1 of 70% of predicted normal values or less ;</li> <li>● A score of 2 or higher</li> </ul>                                                                                                                                                                                                                                                                                                                                                                                                                                                                                                                                                                                                                                                                                                                                                                                                      |
| Singh 2016   | <ul style="list-style-type: none"> <li>● Male or female adults aged <math>\geq 40</math> years with a diagnosis of COPD</li> <li>● Current smokers or ex-smokers</li> <li>● A post-bronchodilator FEV1 <math>&lt; 50\%</math> of the predicted normal value and a post-</li> </ul>                                                                                                                                                                                                                                                                                                                                                                                                                                                                                                                                                                                                                                                                                                                                                                                                                                                                                                                                |

|             |                                                                                                                                                                                                                                                                                                                                                                                                                                                                                                |
|-------------|------------------------------------------------------------------------------------------------------------------------------------------------------------------------------------------------------------------------------------------------------------------------------------------------------------------------------------------------------------------------------------------------------------------------------------------------------------------------------------------------|
|             | <p>bronchodilator FEV1/FVC &lt; 0.7</p> <ul style="list-style-type: none"> <li>● At least one exacerbation in the 12 months preceding the screening visit</li> </ul>                                                                                                                                                                                                                                                                                                                           |
| Sousa 2016  | <ul style="list-style-type: none"> <li>● 40 years of age or older with an established clinical history of COPD,</li> <li>● Current or former smokers with ≥10 pack-years smoking history,</li> <li>● Had a pre- and post-albuterol/salbutamol FEV1/FVC ratio of &lt; 0.7 and a pre- and post-albuterol/salbutamol FEV1 of &lt;70% of predicted normal values.</li> <li>● Had a dyspnoea score of ≥2 on the modified Medical Research Council Dyspnoea Scale<sup>16</sup> at Visit 1</li> </ul> |
| Vestbo 2017 | <ul style="list-style-type: none"> <li>● Male and female COPD patients aged ≥ 40 years</li> <li>● Current smokers or ex-smokers</li> <li>● FEV1&lt;50% predicted (FEV1/FVC &lt;0.7)</li> <li>● At least 1 documented exacerbations in the last 12 Mo</li> </ul>                                                                                                                                                                                                                                |
| Welte 2009  | <ul style="list-style-type: none"> <li>● ≥40 years of age, diagnosed COPD with symptoms ≥2 years, pre-bronchodilatory FEV1 ≤50% of predicted normal values</li> </ul>                                                                                                                                                                                                                                                                                                                          |

**eTable 2 Reasons for studies excluded after full-text review**

| <b>Study</b>    | <b>Reason for exclusion</b>                    |
|-----------------|------------------------------------------------|
| Andò 2008       | Not reporting triple therapy                   |
| Bateman 2008    | Not reporting triple therapy                   |
| Bölükbas 2011   | Duration less than 4 weeks                     |
| Covelli H 2015  | Not reporting triple therapy                   |
| Fang 2008       | Not English article                            |
| Ferroni 2016    | Not randomized trial                           |
| Magnussen 2012  | Not reporting triple therapy                   |
| Mittmann 2011   | Duplicate publication; No interesting outcomes |
| Nielsen 2013    | Duplicate publication; No interesting outcomes |
| Pasqua 2010     | No interesting outcomes                        |
| Perng 2006      | Not randomized trial                           |
| Perng 2009      | Not reporting triple therapy                   |
| Rabe 2008       | Not reporting triple therapy                   |
| Roisman 2007    | Not English article                            |
| Saito 2015      | No interesting outcomes                        |
| Samp 2017       | Not randomized trial                           |
| Saraç 2016      | Not reporting triple therapy                   |
| Short 2012      | Not randomized trial                           |
| Siler 2016      | Duplicate publication                          |
| Singh 2008      | Duration less than 4 weeks                     |
| Singh 2017      | Not randomized trial                           |
| Trudo 2015      | Not randomized trial                           |
| Vogelmeier 2013 | Not reporting triple therapy                   |
| Wedzicha 2008   | Not reporting triple therapy                   |
| Wedzicha 2016   | Not reporting triple therapy                   |
| Williamson 2010 | No interesting outcomes                        |

### **Studies excluded after full-text review**

- 1 Andò F, Ruggeri P, Girbino G, et al. Tiotropium and salmeterol/fluticasone combination do not cause oxygen desaturation in COPD. *Respir Med* 2008;102(6):815-8.
- 2 Bateman ED, van Dyk M, Sagriotis A. Comparable spirometric efficacy of tiotropium compared with salmeterol plus fluticasone in patients with COPD: A pilot study. *Pulm Pharmacol Ther* 2008;21(1):20-5.
- 3 Bölükbas S, Eberlein M, Eckhoff J, et al. Short-term effects of inhalative tiotropium/formoterol/budesonide versus tiotropium/formoterol in patients with newly diagnosed chronic obstructive pulmonary disease requiring surgery for lung cancer: a prospective randomized trial. *Eur J Cardiothorac Surg* 2011;39(6):995-1000.
- 4 Covelli H, Pek B, Schenkenberger I, et al. Efficacy and safety of fluticasone furoate/vilanterol or tiotropium in subjects with COPD at cardiovascular risk. *Int J Chron Obstruct Pulmon Dis* 2015;11:1-12.
- 5 Fang LZ, Liang X, Zhang JQ, et al. Combination of inhaled salmeterol/fluticasone and tiotropium in the treatment of chronic obstructive pulmonary disease: a randomised controlled trial. *Zhonghua Jie He He Hu Xi Za Zhi* 2008;31(11):811-4.
- 6 Ferroni E, Belleudi V, Cascini S, et al. Role of Tiotropium in Reducing Exacerbations of Chronic Obstructive Pulmonary Disease When Combined With Long-Acting  $\beta_2$ -Agonists and Inhaled Corticosteroids: The OUTPUT Study. *J Clin Pharmacol* 2016 ;56(11):1423-1432.
- 7 Magnussen H, Paggiaro P, Schmidt H, et al. Effect of combination treatment on lung volumes and exercise endurance time in COPD. *Respir Med* 2012;106(10):1413-20.
- 8 Mittmann N, Hernandez P, Mellström C, et al. Cost effectiveness of budesonide/formoterol added to tiotropium bromide versus placebo added to tiotropium bromide in patients with chronic obstructive pulmonary disease: Australian, Canadian and Swedish healthcare perspectives. *Pharmacoeconomics* 2011;29(5):403-14.
- 9 Nielsen R, Kankaanranta H, Bjermer L, Lange P, Arnetorp S, Hedegaard M, Stenling A, Mittmann N. Cost effectiveness of adding budesonide/formoterol to tiotropium in COPD in four Nordic countries. *Respir Med* 2013;107(11):1709-21.
- 10 Pasqua F, Biscione G, Crigna G, et al. Combining triple therapy and pulmonary rehabilitation in patients with advanced COPD: a pilot study. *Respir Med* 2010;104(3):412-7.

- 11 Perng DW, Wu CC, Su KC, et al. Additive benefits of tiotropium in COPD patients treated with long-acting b2 agonists and corticosteroids. *Respirology* 2006;11(5):598-602.
- 12 Perng DW, Tao CW, Su KC, et al. Anti-inflammatory effects of salmeterol/ fluticasone, tiotropium/ fluticasone or tiotropium in COPD. *Eur Respir J* 2009;33(4):778-84.
- 13 Rabe KF, Timmer W, Sagkriotis A, et al. Comparison of a combination of tiotropium plus formoterol to salmeterol plus fluticasone in moderate COPD. *Chest* 2008;134(2):255-262.
- 14 Roisman G. Tiotropium in combination with placebo, salmeterol, or fluticasone- salmeterol for treatment of chronic obstructive pulmonary disease. A randomized trial. *Revue de Pneumologie Clinique* 2007; 63:390-391
- 15 Saito T, Takeda A, Hashimoto K, et al. Triple therapy with salmeterol/fluticasone propionate 50/250 plus tiotropium bromide improve lung function versus individual treatments in moderate-to-severe Japanese COPD patients: a randomized controlled trial - Evaluation of Airway sGaw after treatment with tripLE. *Int J Chron Obstruct Pulmon Dis* 2015;10:2393-404.
- 16 Samp JC, Joo MJ, Schumock GT, et al. Comparative Effectiveness of Long-Acting Beta2 -Agonist Combined with a Long-Acting Muscarinic Antagonist or Inhaled Corticosteroid in Chronic Obstructive Pulmonary Disease. *Pharmacotherapy* 2017;37(4):447-455.
- 17 Saraç P, Sayiner A. Compare the efficacy and safety of long-acting anticholinergic and a combination of inhaled steroids and long-acting beta-2 agonist in moderate chronic obstructive pulmonary disease. *Tuberk Toraks* 2016;64(2):112-8.
- 18 Short PM, Williamson PA, Elder DHJ, et al. The impact of tiotropium on mortality and exacerbations when added to inhaled corticosteroids and long-acting  $\beta$ -agonist therapy in COPD. *Chest* 2012;141(1):81-86.
- 19 Siler TM., Kerwin E, Tombs L, et al. Triple Therapy of Umeclidinium + Inhaled Corticosteroids/Long-Acting Beta2 Agonists for Patients with COPD: Pooled Results of Randomized Placebo-Controlled Trials. *Pulm Ther* 2016; 2:43-58.
- 20 Singh D, Brooks J, Hagan G, et al. Superiority of "triple" therapy with salmeterol/fluticasone propionate and tiotropium bromide versus individual components in moderate to severe COPD. *Thorax* 2008;63(7):592-8.
- 21 Singh D, Corradi M, Spinola M, et al. Triple therapy in COPD: new evidence with the extrafine fixed combination of beclomethasone dipropionate, formoterol fumarate, and glycopyrronium



bromide. *Int J Chron Obstruct Pulmon Dis* 2017;12:2917-2928.

22 Trudo F, Kern DM, Davis JR, et al. Comparative effectiveness of budesonide/formoterol combination and tiotropium bromide among COPD patients new to these controller treatments. *Int J Chron Obstruct Pulmon Dis* 2015;10:2055-66.

23 Vogelmeier CF, Bateman ED, Pallante J, et al. Efficacy and safety of once-daily QVA149 compared with twice-daily salmeterol-fluticasone in patients with chronic obstructive pulmonary disease (ILLUMINATE): a randomised, double-blind, parallel group study. *Lancet Respir Med* 2013;1(1):51-60.

24 Wedzicha JA, Calverley PM, Seemungal TA, et al. The prevention of chronic obstructive pulmonary disease exacerbations by salmeterol/fluticasone propionate or tiotropium bromide. *Am J Respir Crit Care Med*. 2008;177(1):19-26.

25 Wedzicha JA, Banerji D, Chapman KR, et al. Indacaterol-Glycopyrronium versus Salmeterol-Fluticasone for COPD. *N Engl J Med*. 2016;374(23):2222-34.

26 Williamson PA, Short PM, Clearie KL, et al. Paradoxical trough effects of triple therapy with budesonide/formoterol and tiotropium bromide on pulmonary function outcomes in COPD. *Chest*. 2010;138(3):595-604.

**eTable 3. Subgroup analysis by duration**

| <b>Outcome</b>                    | <b>Reference</b> | <b>Effect Size (95% CI)</b> | <b>P value</b> |
|-----------------------------------|------------------|-----------------------------|----------------|
| <b>Triple therapy vs ICS/LABA</b> |                  |                             |                |
| <b>Duration ≥ 6 months</b>        |                  |                             |                |
| Exacerbation rates per patients   | 3                | 0.77 (0.66, 0.91)           | 0.03           |
| All cause death                   | 3                | 0.95 (0.73, 1.23)           | 0.70           |
| FEV1 trough, L                    | 3                | 0.11 (0.06, 0.15)           | 0              |
| AEs                               | 3                | 0.98 (0.91, 1.07)           | 0.11           |
| SAEs                              | 3                | 0.74 (0.48, 1.15)           | 0.89           |
| Cardiovascular                    | 3                | 1.02 (0.91, 1.15)           | 0.75           |
| Pneumonia                         | 3                | 1.36 (0.86, 2.14)           | 0.19           |
| SGRQ score                        |                  | -1.83 (-2.47, -1.19)        | 0              |
| <b>Duration &lt; 6 months</b>     |                  |                             |                |
| All cause death                   | 6                | 0.27 (0.09, 0.88)           | 0.03           |
| FEV1 trough, L                    | 9                | 0.12 (0.10, 0.13)           | 0              |
| AEs                               | 7                | 1.02 (0.99, 1.05)           | 0.68           |
| SAEs                              | 6                | 0.99 (0.87, 1.13)           | 0.19           |
| Cardiovascular                    | 5                | 0.65 (0.39, 1.06)           | 0.09           |
| Pneumonia                         | 6                | 0.80 (0.41, 1.57)           | 0.52           |
| SGRQ score                        |                  | -1.79 (-2.47, -1.12)        | 0              |
| <b>Triple therapy vs LAMA</b>     |                  |                             |                |
| <b>Duration ≥ 6 months</b>        |                  |                             |                |
| Exacerbation rates per patients   | 2                | 0.80 (0.73, 0.89)           | 0              |
| Severe exacerbations              | 2                | 0.62 (0.49, 0.87)           | 0              |
| All cause death                   | 2                | 0.74 (0.46, 1.18)           | 0.21           |
| FEV1 trough, L                    | 3                | 0.06 (0.04, 0.08)           | 0              |
| AEs                               | 2                | 1.05 (0.82, 1.34)           | 0.72           |
| SAEs                              | 2                | 0.85 (0.71, 1.02)           | 0.09           |
| Pneumonia                         | 2                | 1.44 (0.85, 2.45)           | 0.18           |
| SGRQ score                        | 3                | -2.32(-3.81, -0.82)         | 0.02           |
| <b>Duration &lt; 6 months</b>     |                  |                             |                |
| Exacerbation rates per patients   | 3                | 0.58 (0.38, 0.87)           | 0.008          |
| Severe exacerbations              | 2                | 0.33 (0.16, 0.67)           | 0.002          |
| All cause death                   | 2                | 0.46 (0.10, 2.04)           | 0.30           |
| FEV1 trough, L                    | 8                | 0.08 (0.06, 0.09)           | 0              |
| AEs                               | 4                | 1.02 (0.87, 1.19)           | 0.83           |
| SAEs                              | 4                | 0.77 (0.54, 1.09)           | 0.15           |
| Pneumonia                         | 2                | 0.61 (0.15, 2.54)           | 0.50           |
| SGRQ score                        | 5                | -3.30 (-4.87, -1.73)        | 0              |

**eTable 4. Subgroup analysis by eosinophil level (Descriptive analysis)**

| Study                              | Rate ratio of Moderate to severe exacerbations          |                                                         |
|------------------------------------|---------------------------------------------------------|---------------------------------------------------------|
|                                    | Eosinophil level $\geq 200$ or 150 cells per microliter | Eosinophil level $\leq 200$ or 150 cells per microliter |
| <b>Triple therapy vs LAMA</b>      |                                                         |                                                         |
| Vestbo 2017 (fixed triple)         | 0.64 (0.51-0.81)                                        | 0.92 (0.77-1.10)                                        |
| Vestbo 2017 (open triple)          | 0.62 (0.47-0.83)                                        | 0.91 (0.72-1.14)                                        |
| <b>Triple therapy vs LAMA+LABA</b> |                                                         |                                                         |
| Lipson 2018                        | Annual Rate: 0.95 vs 1.39                               | Annual Rate: 0.85 vs 0.97                               |
| Papi 2018                          | 0.81(0.65-1.01)                                         | 0.87(0.69-1.10)                                         |
| <b>Triple therapy vs ICS+LABA</b>  |                                                         |                                                         |
| Lipson 2018                        | Annual Rate: 0.95 vs 1.08                               | Annual Rate: 0.85 vs 1.06                               |
| Singh 2016                         | 0.80(0.65-0.99)                                         | 0.72(0.52-1.00)                                         |

**eTable 5. Sensitivity Analyses Removing Studies with High Risk of Bias**

| Outcomes                          | N. of trials | Effect Size (95% CI) | I <sup>2</sup> value | P value |
|-----------------------------------|--------------|----------------------|----------------------|---------|
| <b>Triple therapy vs LAMA</b>     |              |                      |                      |         |
| Efficacy                          |              |                      |                      |         |
| Exacerbation rates per patients   | 4            | 0.73 (0.60, 0.90)    | 67.5                 | 0.002   |
| Number of patients with 1 or more | 3            | 0.79 (0.66, 0.94)    | 78.2                 | 0.01    |
| Time to first exacerbation        | 3            | 0.70 (0.53, 0.93)    | 78.1                 | 0.014   |
| Severe exacerbations              | 4            | 0.58 (0.47, 0.72)    | 0                    | 0       |
| All cause death                   | 4            | 0.71 (0.45, 1.10)    | 23.3                 | 0.125   |
| FEV1 trough, L                    | 6            | 0.07 (0.05, 0.08)    | 0                    | 0       |
| Safety                            |              |                      |                      |         |
| AEs                               | 5            | 0.99 (0.93, 1.05)    | 0                    | 0.731   |
| SAEs                              | 4            | 0.82 (0.69, 0.98)    | 0                    | 0.03    |
| Cardiovascular                    | 2            | 0.77 (0.45, 1.31)    | 0                    | 0.331   |
| Pneumonia                         | 2            | 1.44 (0.85, 2.45)    | 0                    | 0.18    |
| Quality of life                   |              |                      |                      |         |
| SGRQ score                        | 4            | -2.25 (-3.45, -1.05) | 0                    | 0       |

high risk of bias was defined according to the Cochrane Instrument

eFigure 1A Association of triple therapy with the rate of moderate or severe exacerbations

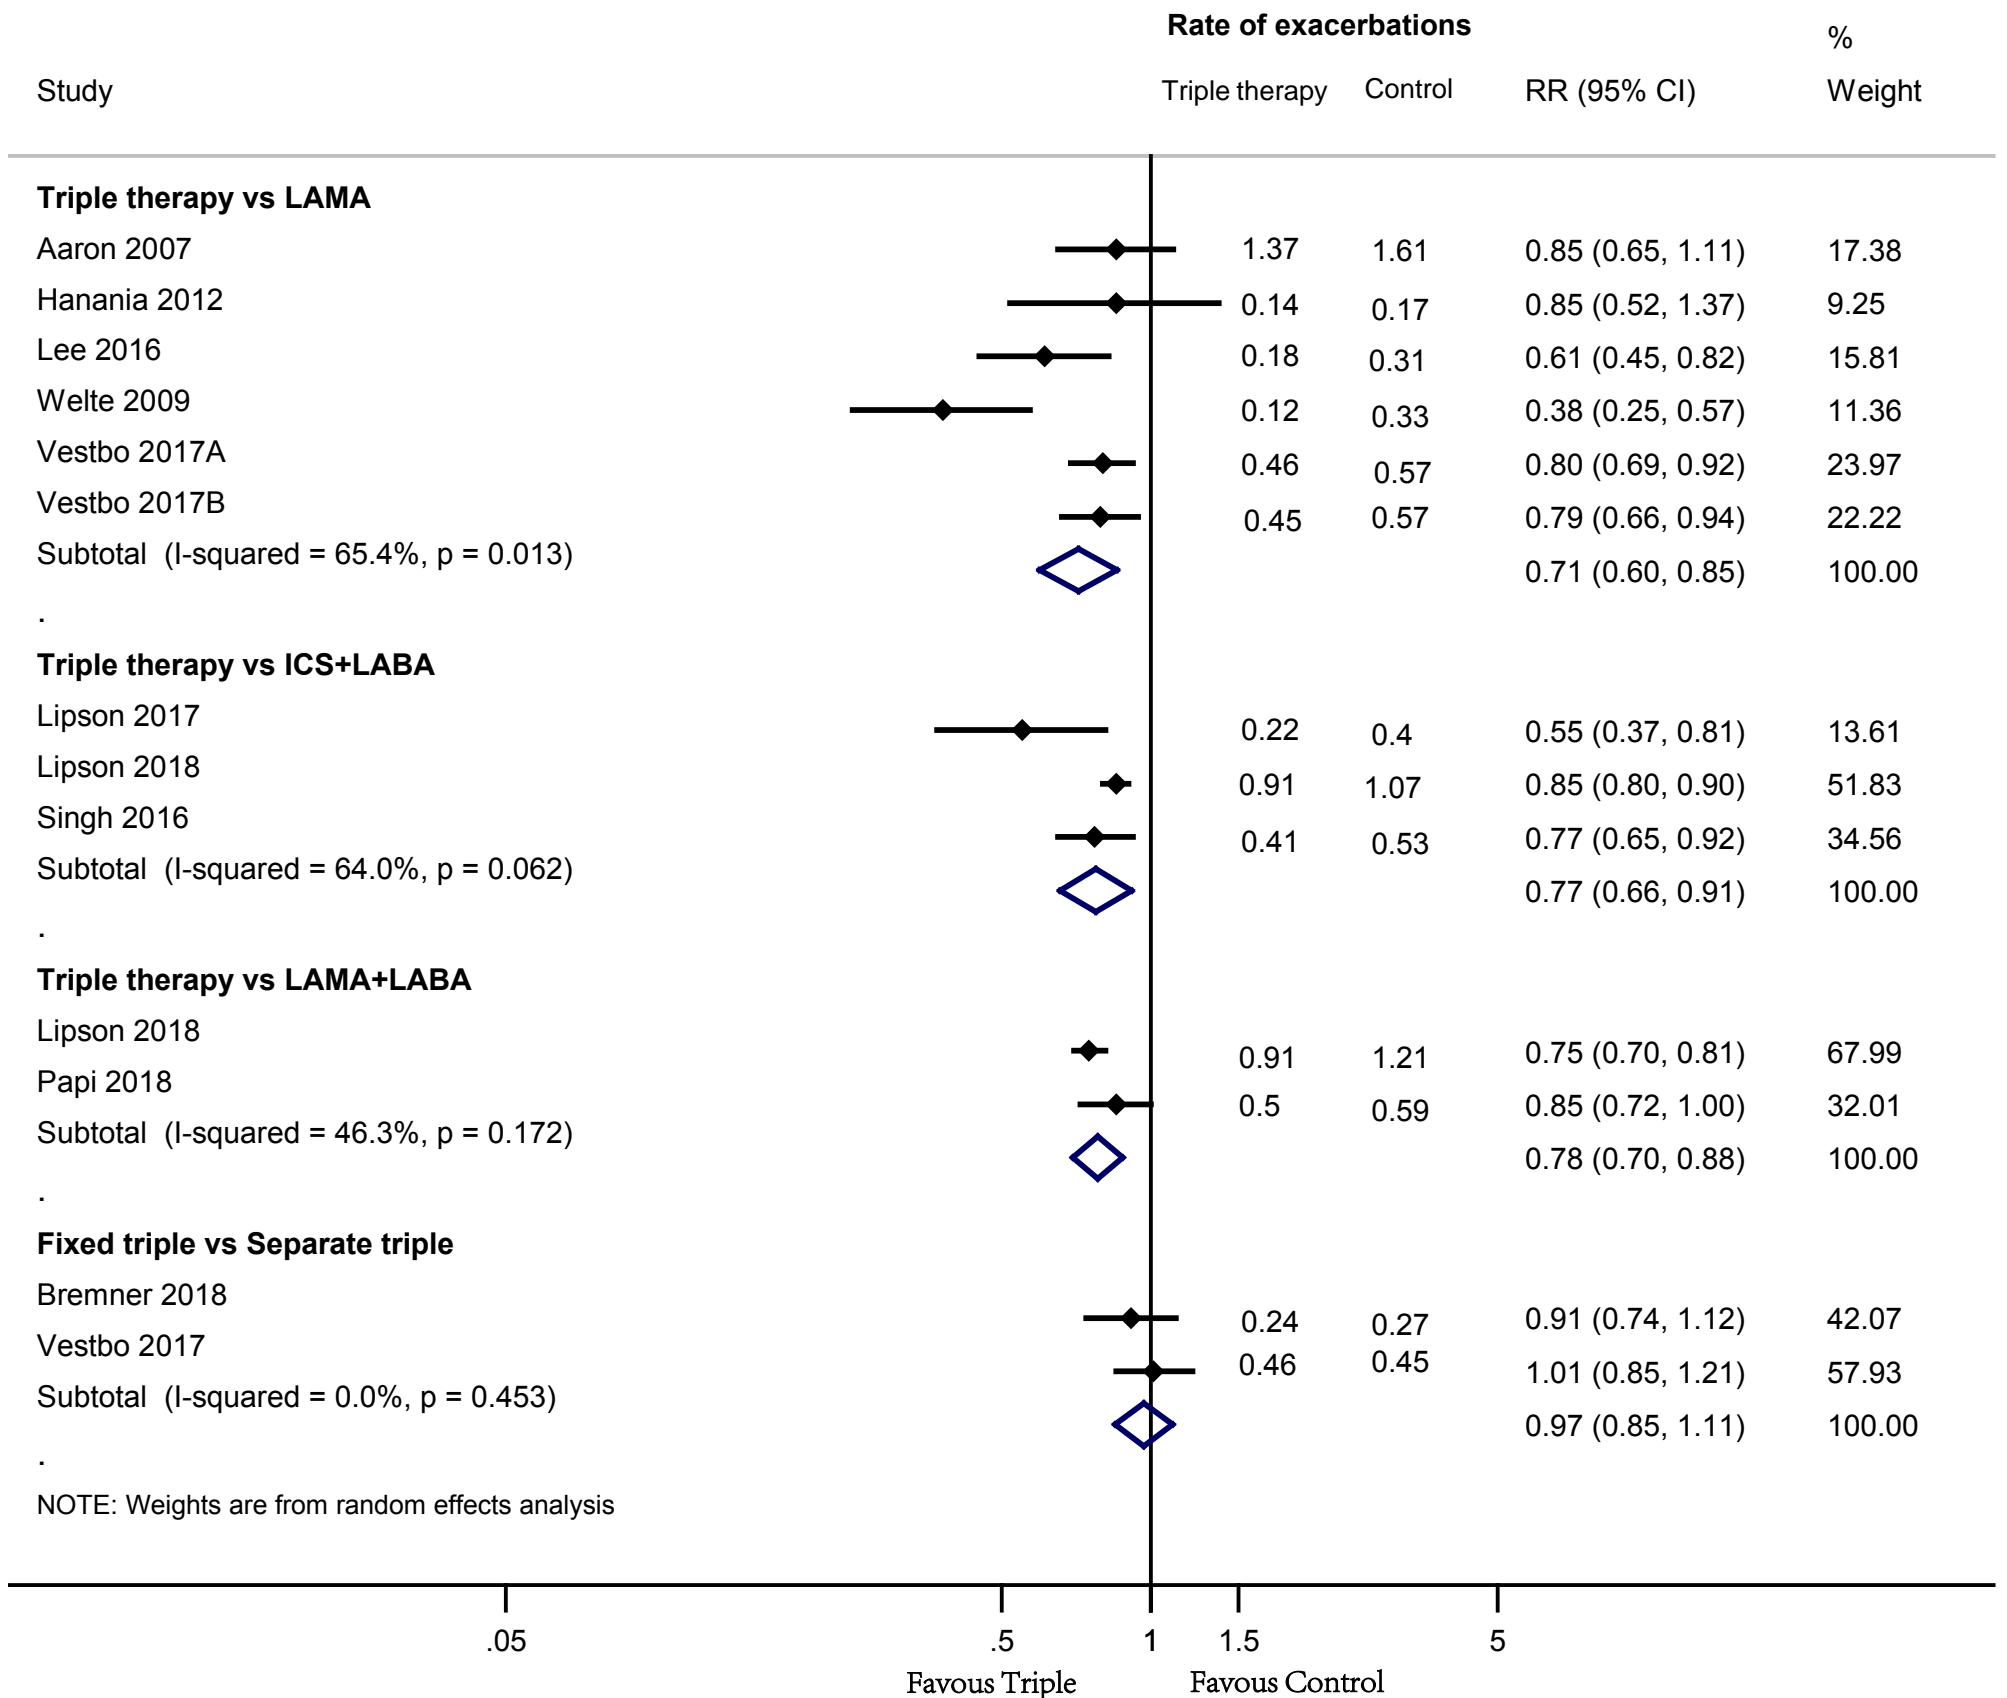

eFigure 1B Association of triple therapy with the number of patients with 1 or more moderate or severe exacerbations

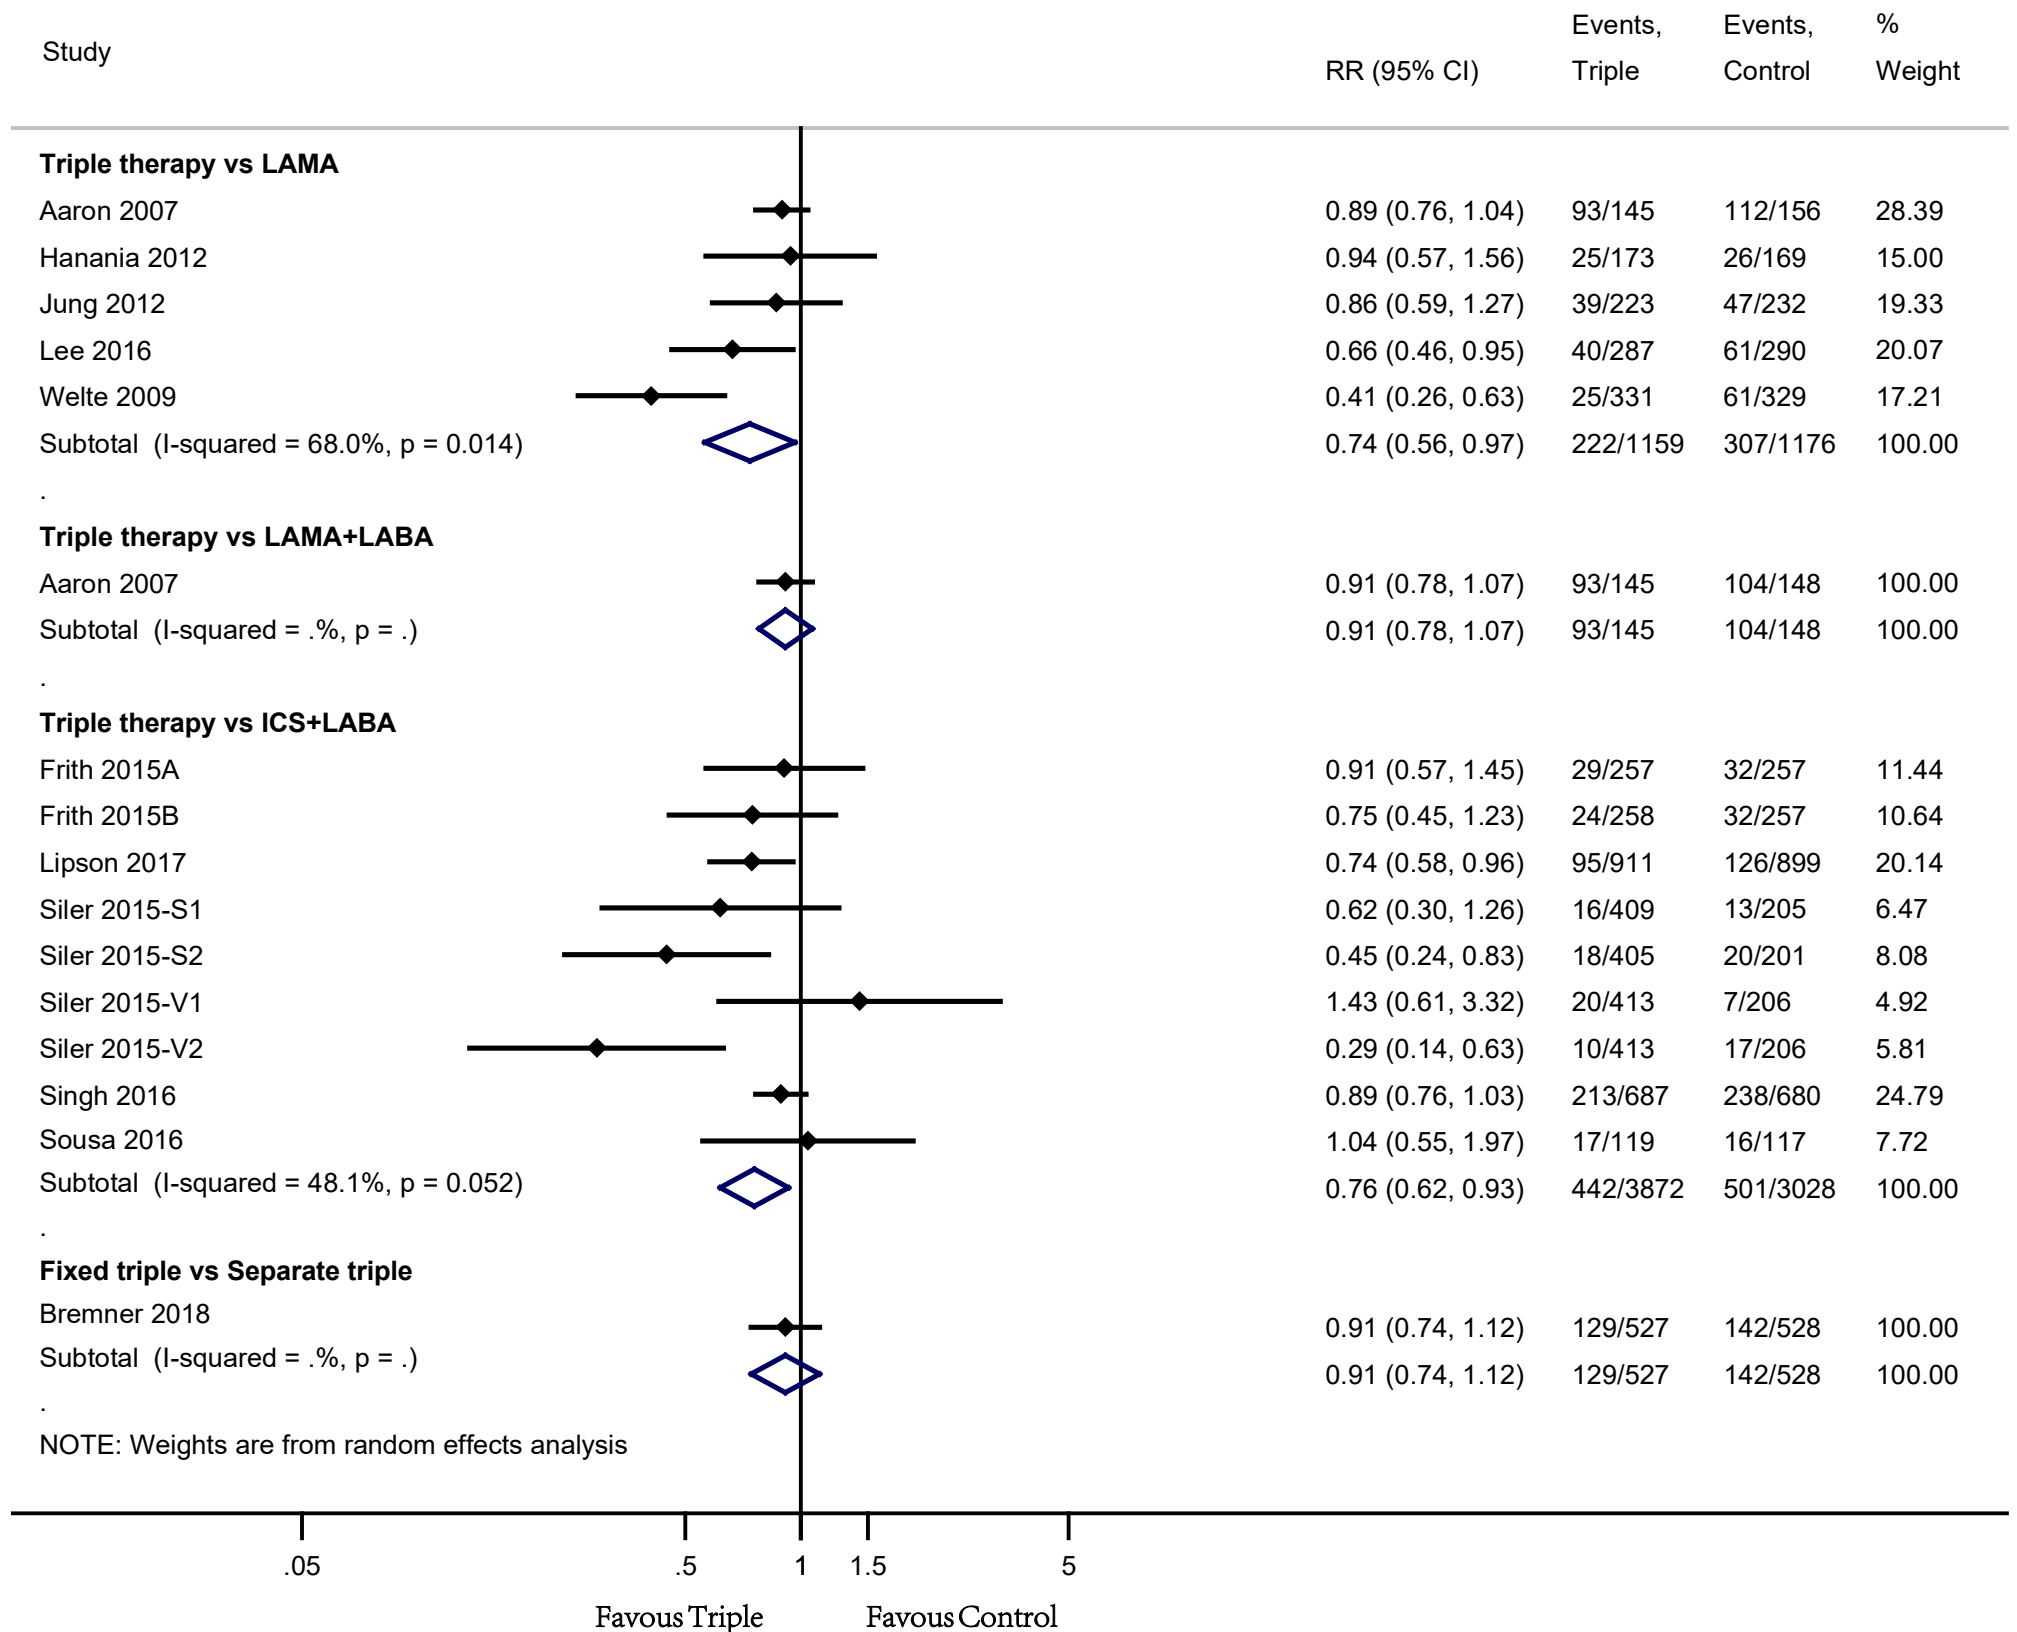

eFigure 1 Association of triple therapy with time to first moderate or severe exacerbations

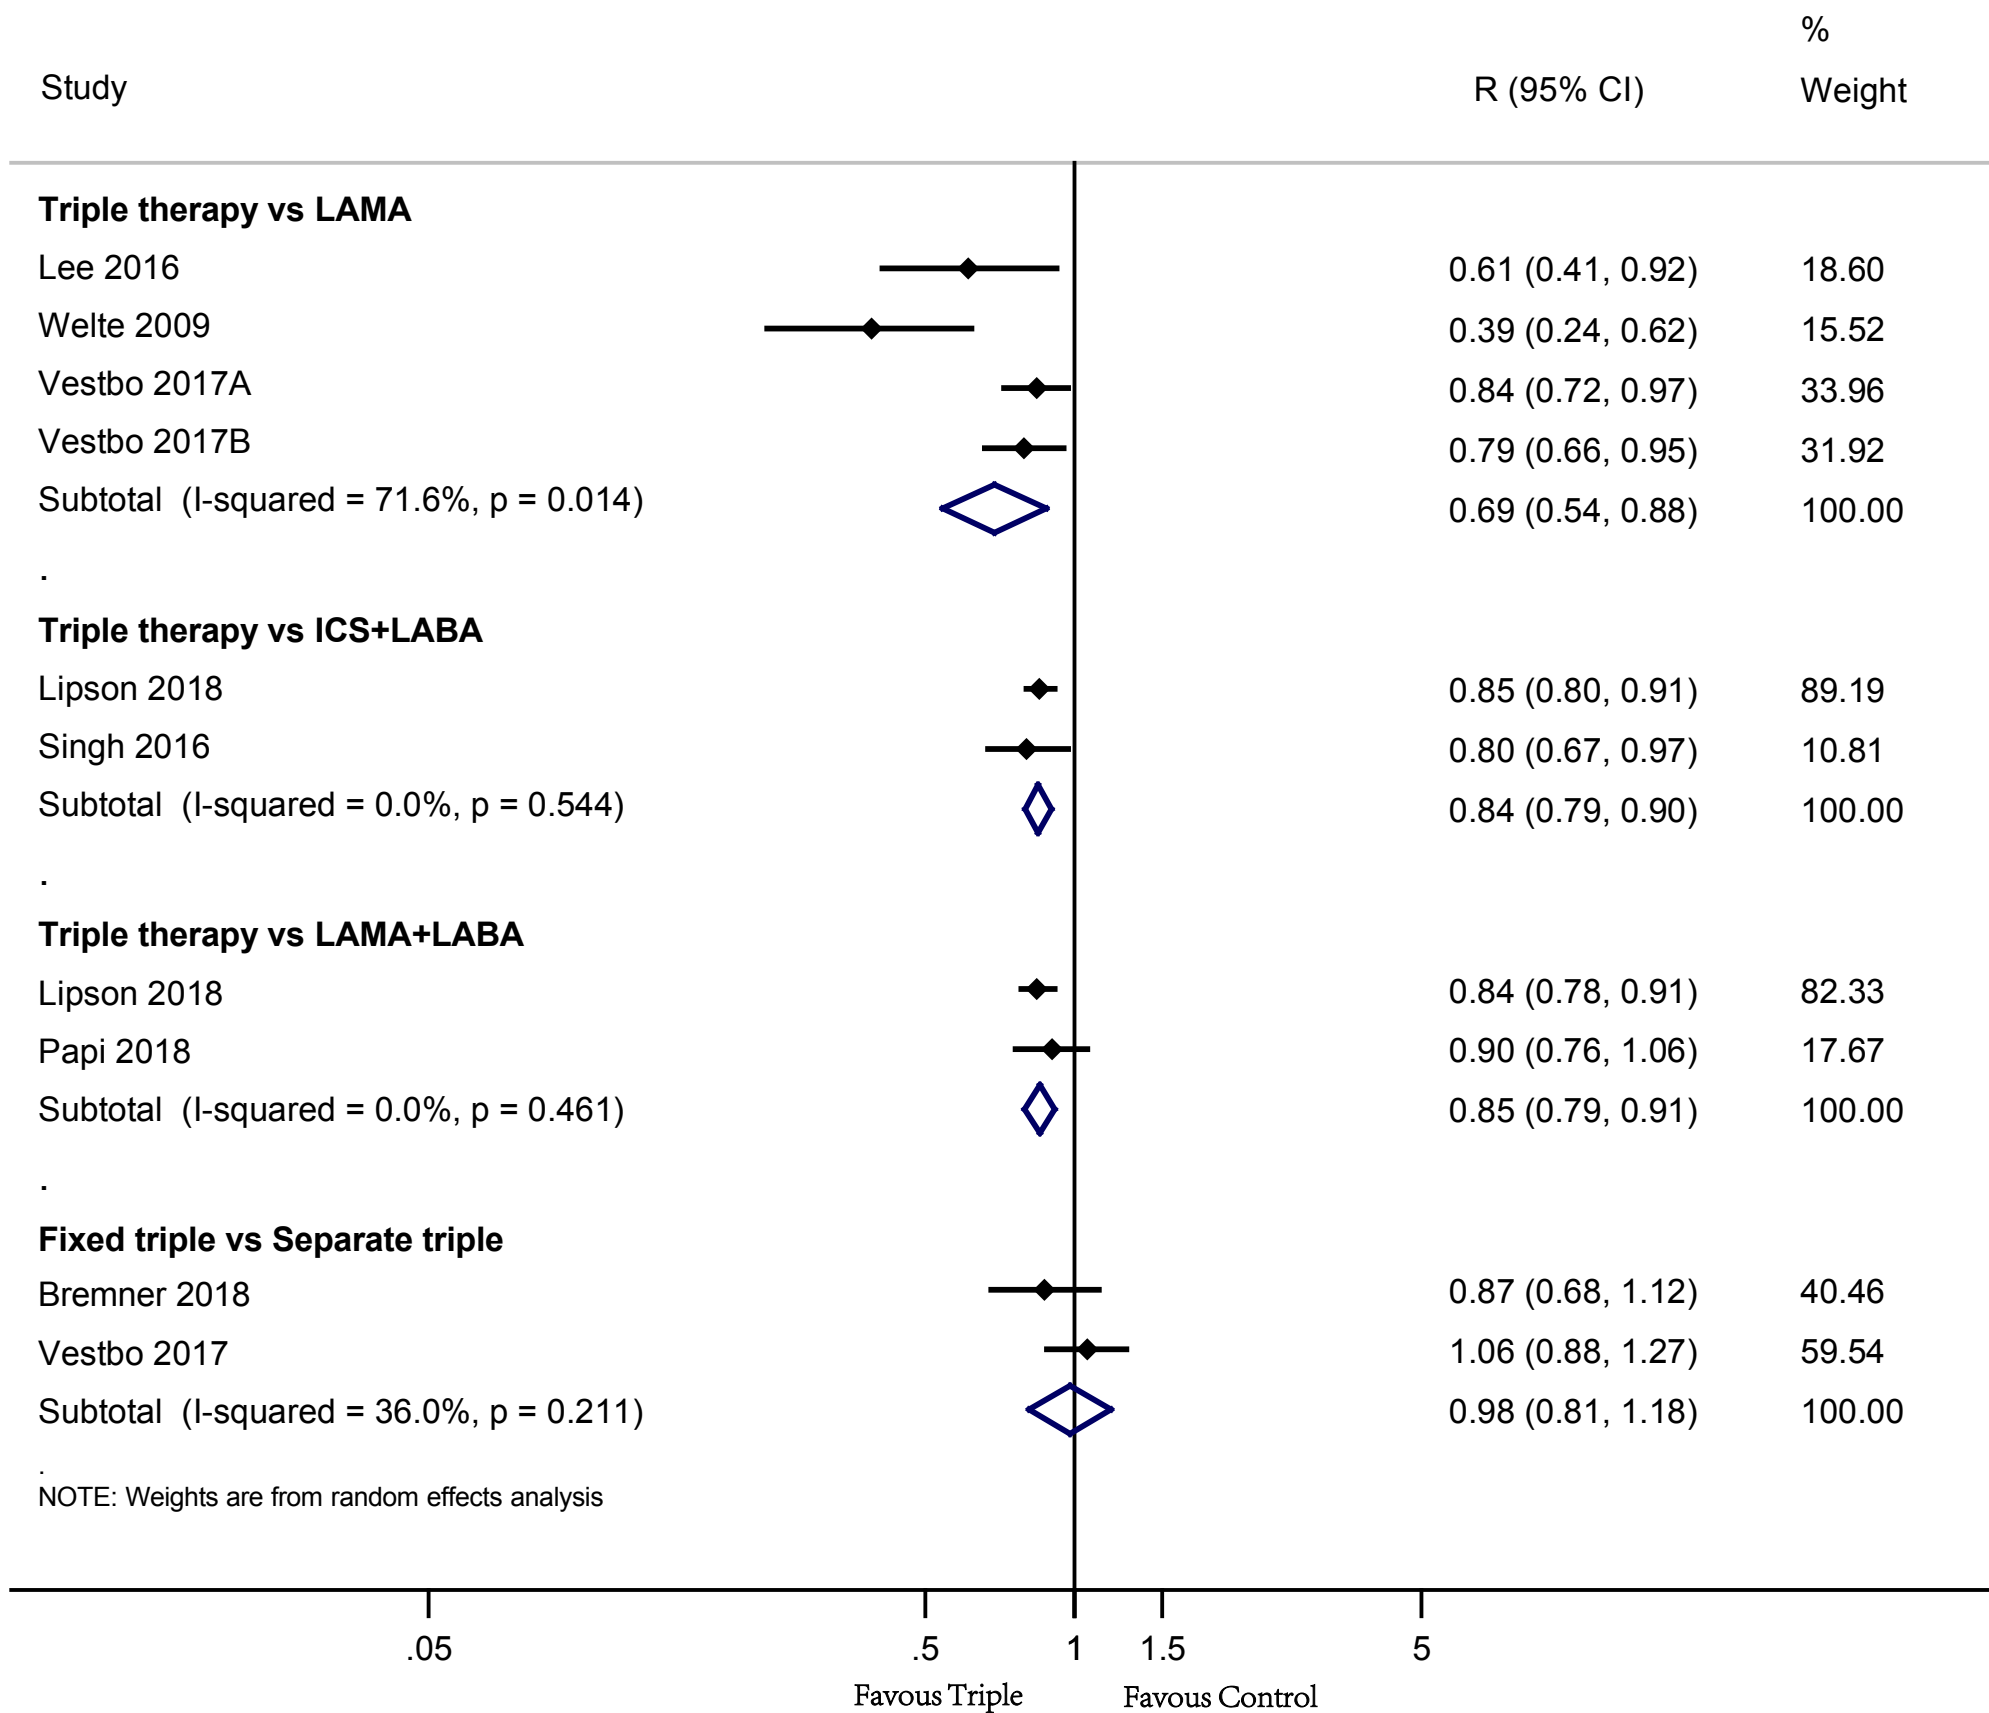

eFigure 2A Association of triple therapy with the rate of severe exacerbations

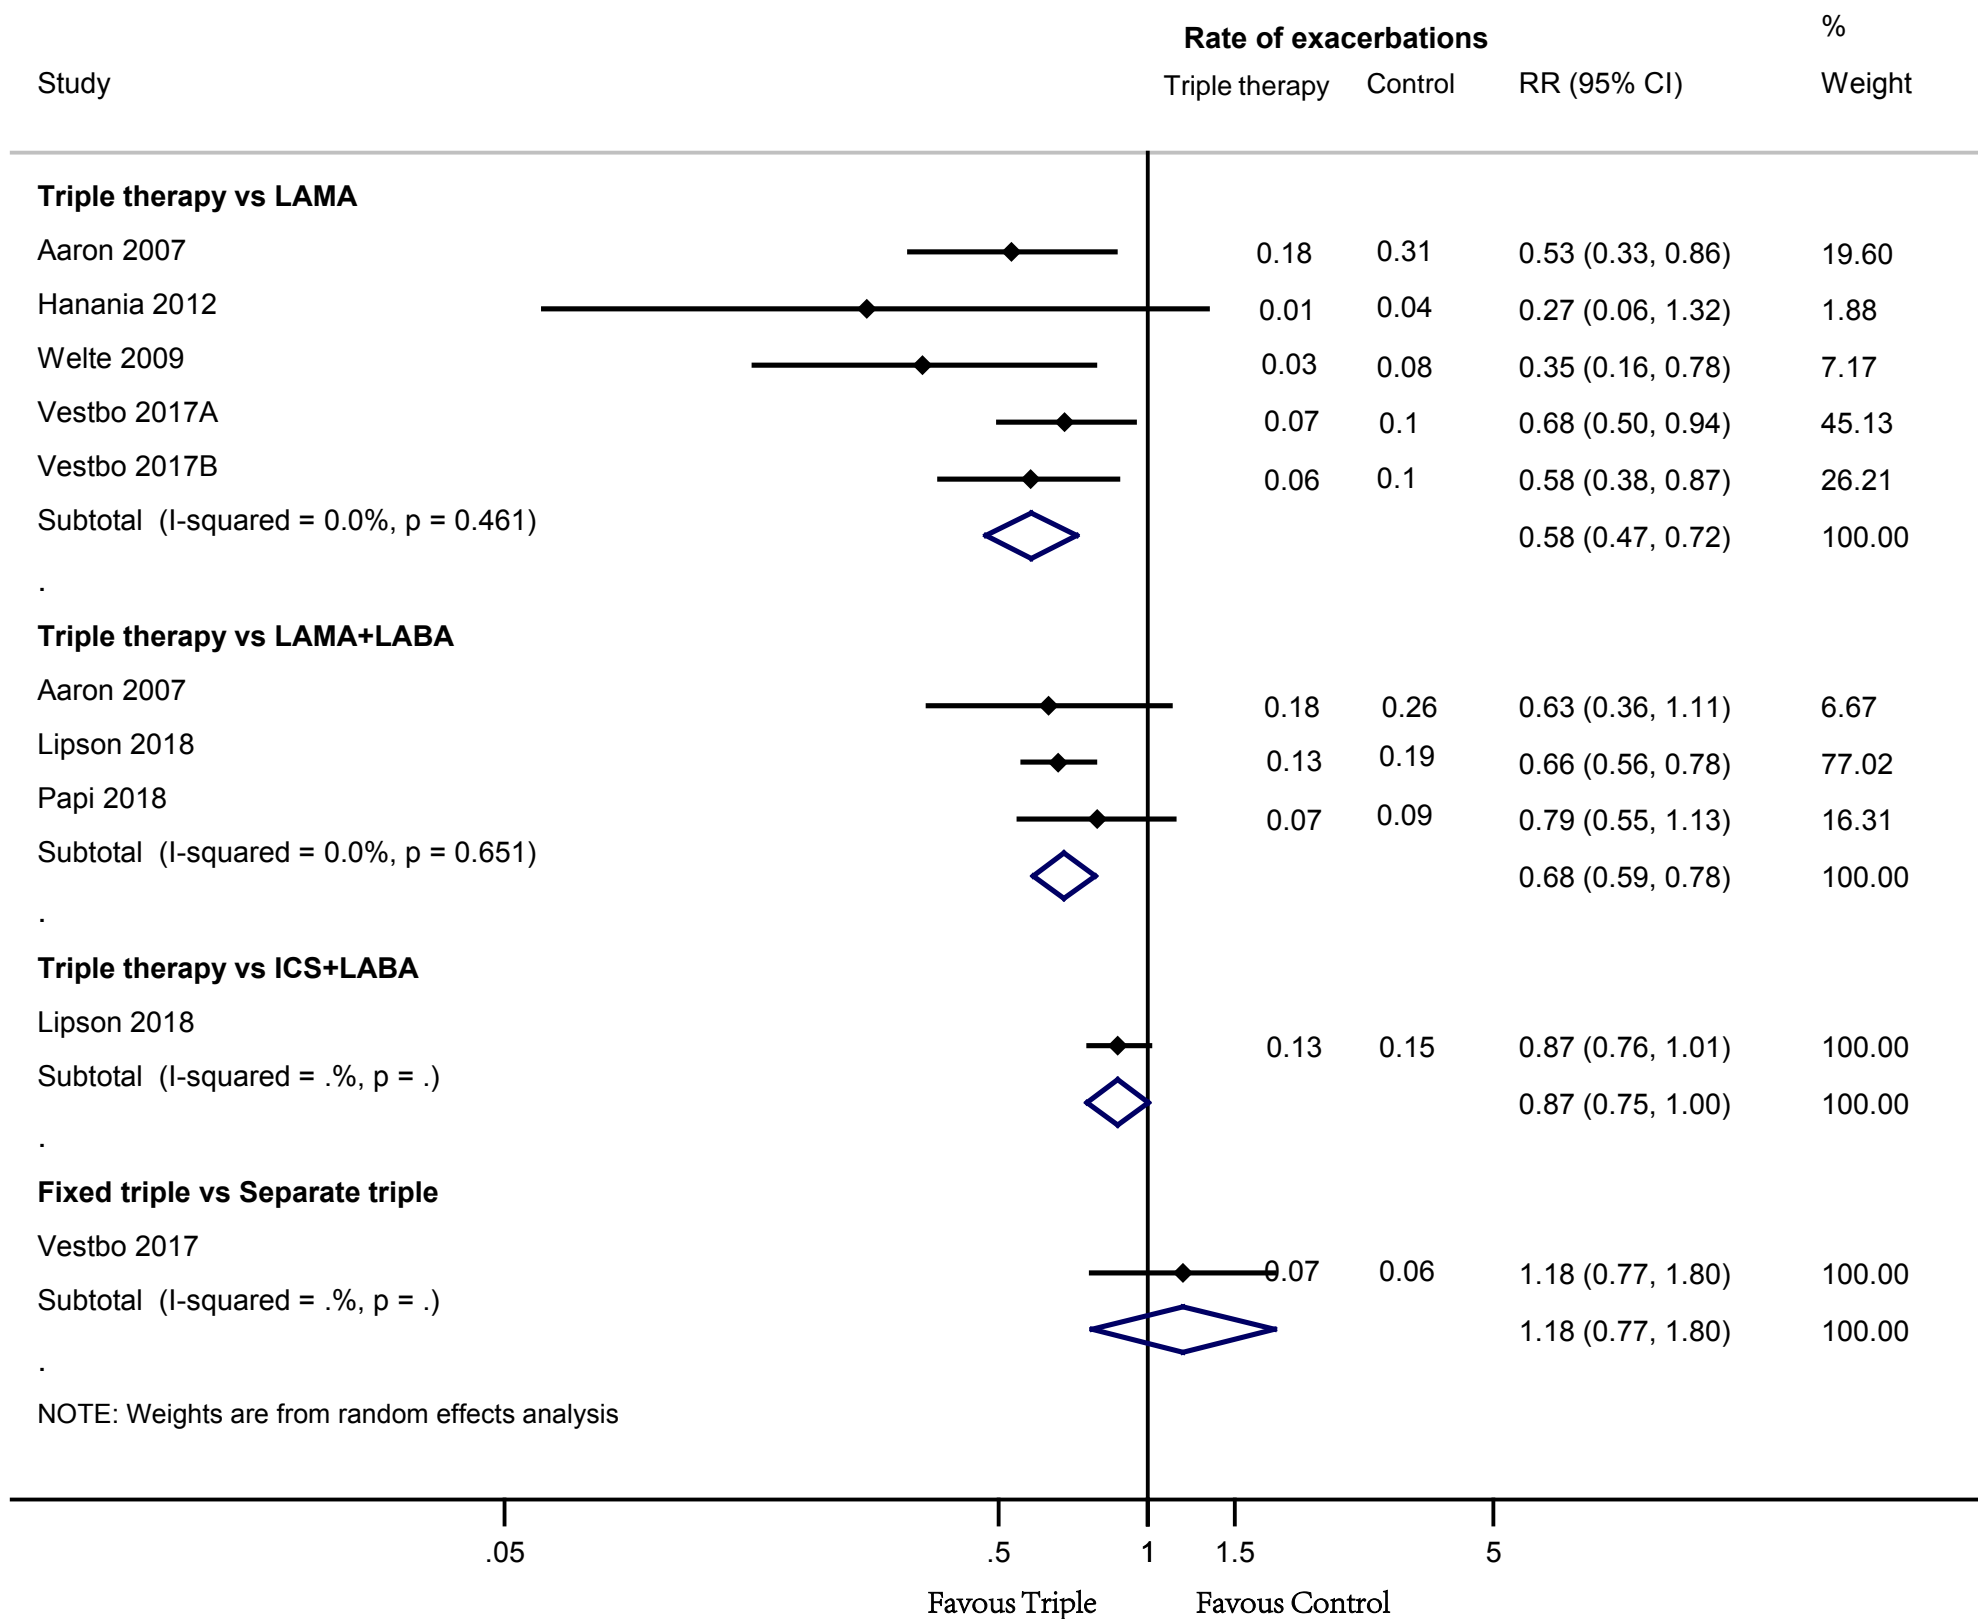



eFigure 2B Association of triple therapy with death from any cause

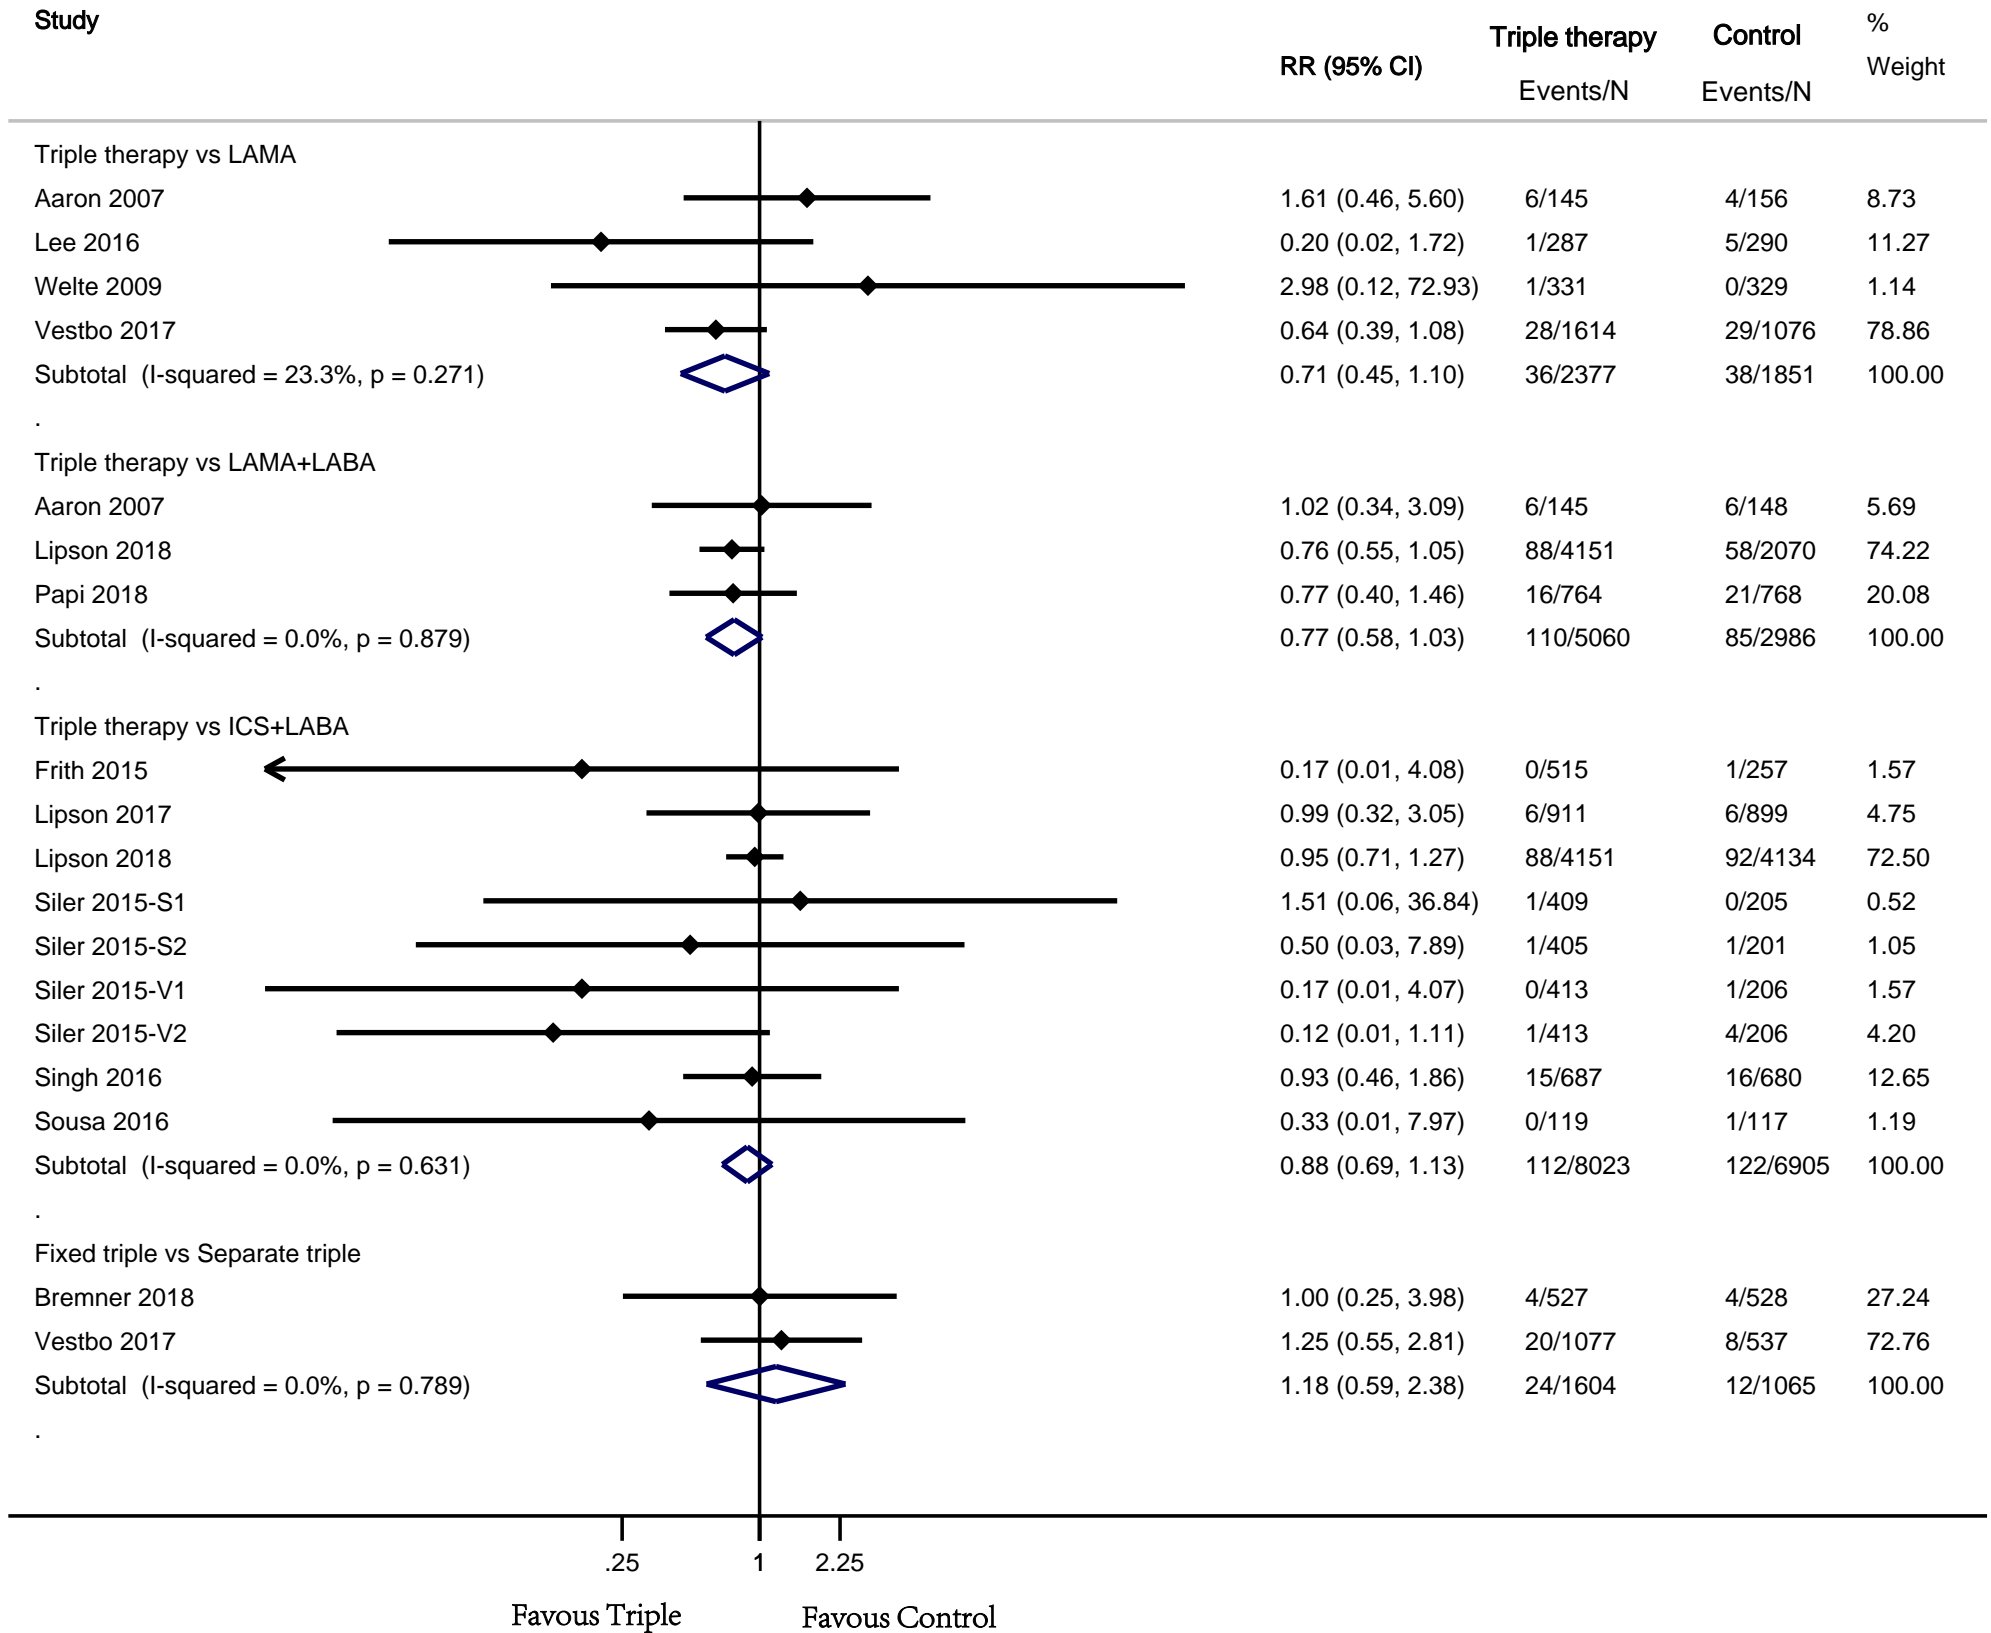

eFigure 2C Association of triple therapy with trough FEV1

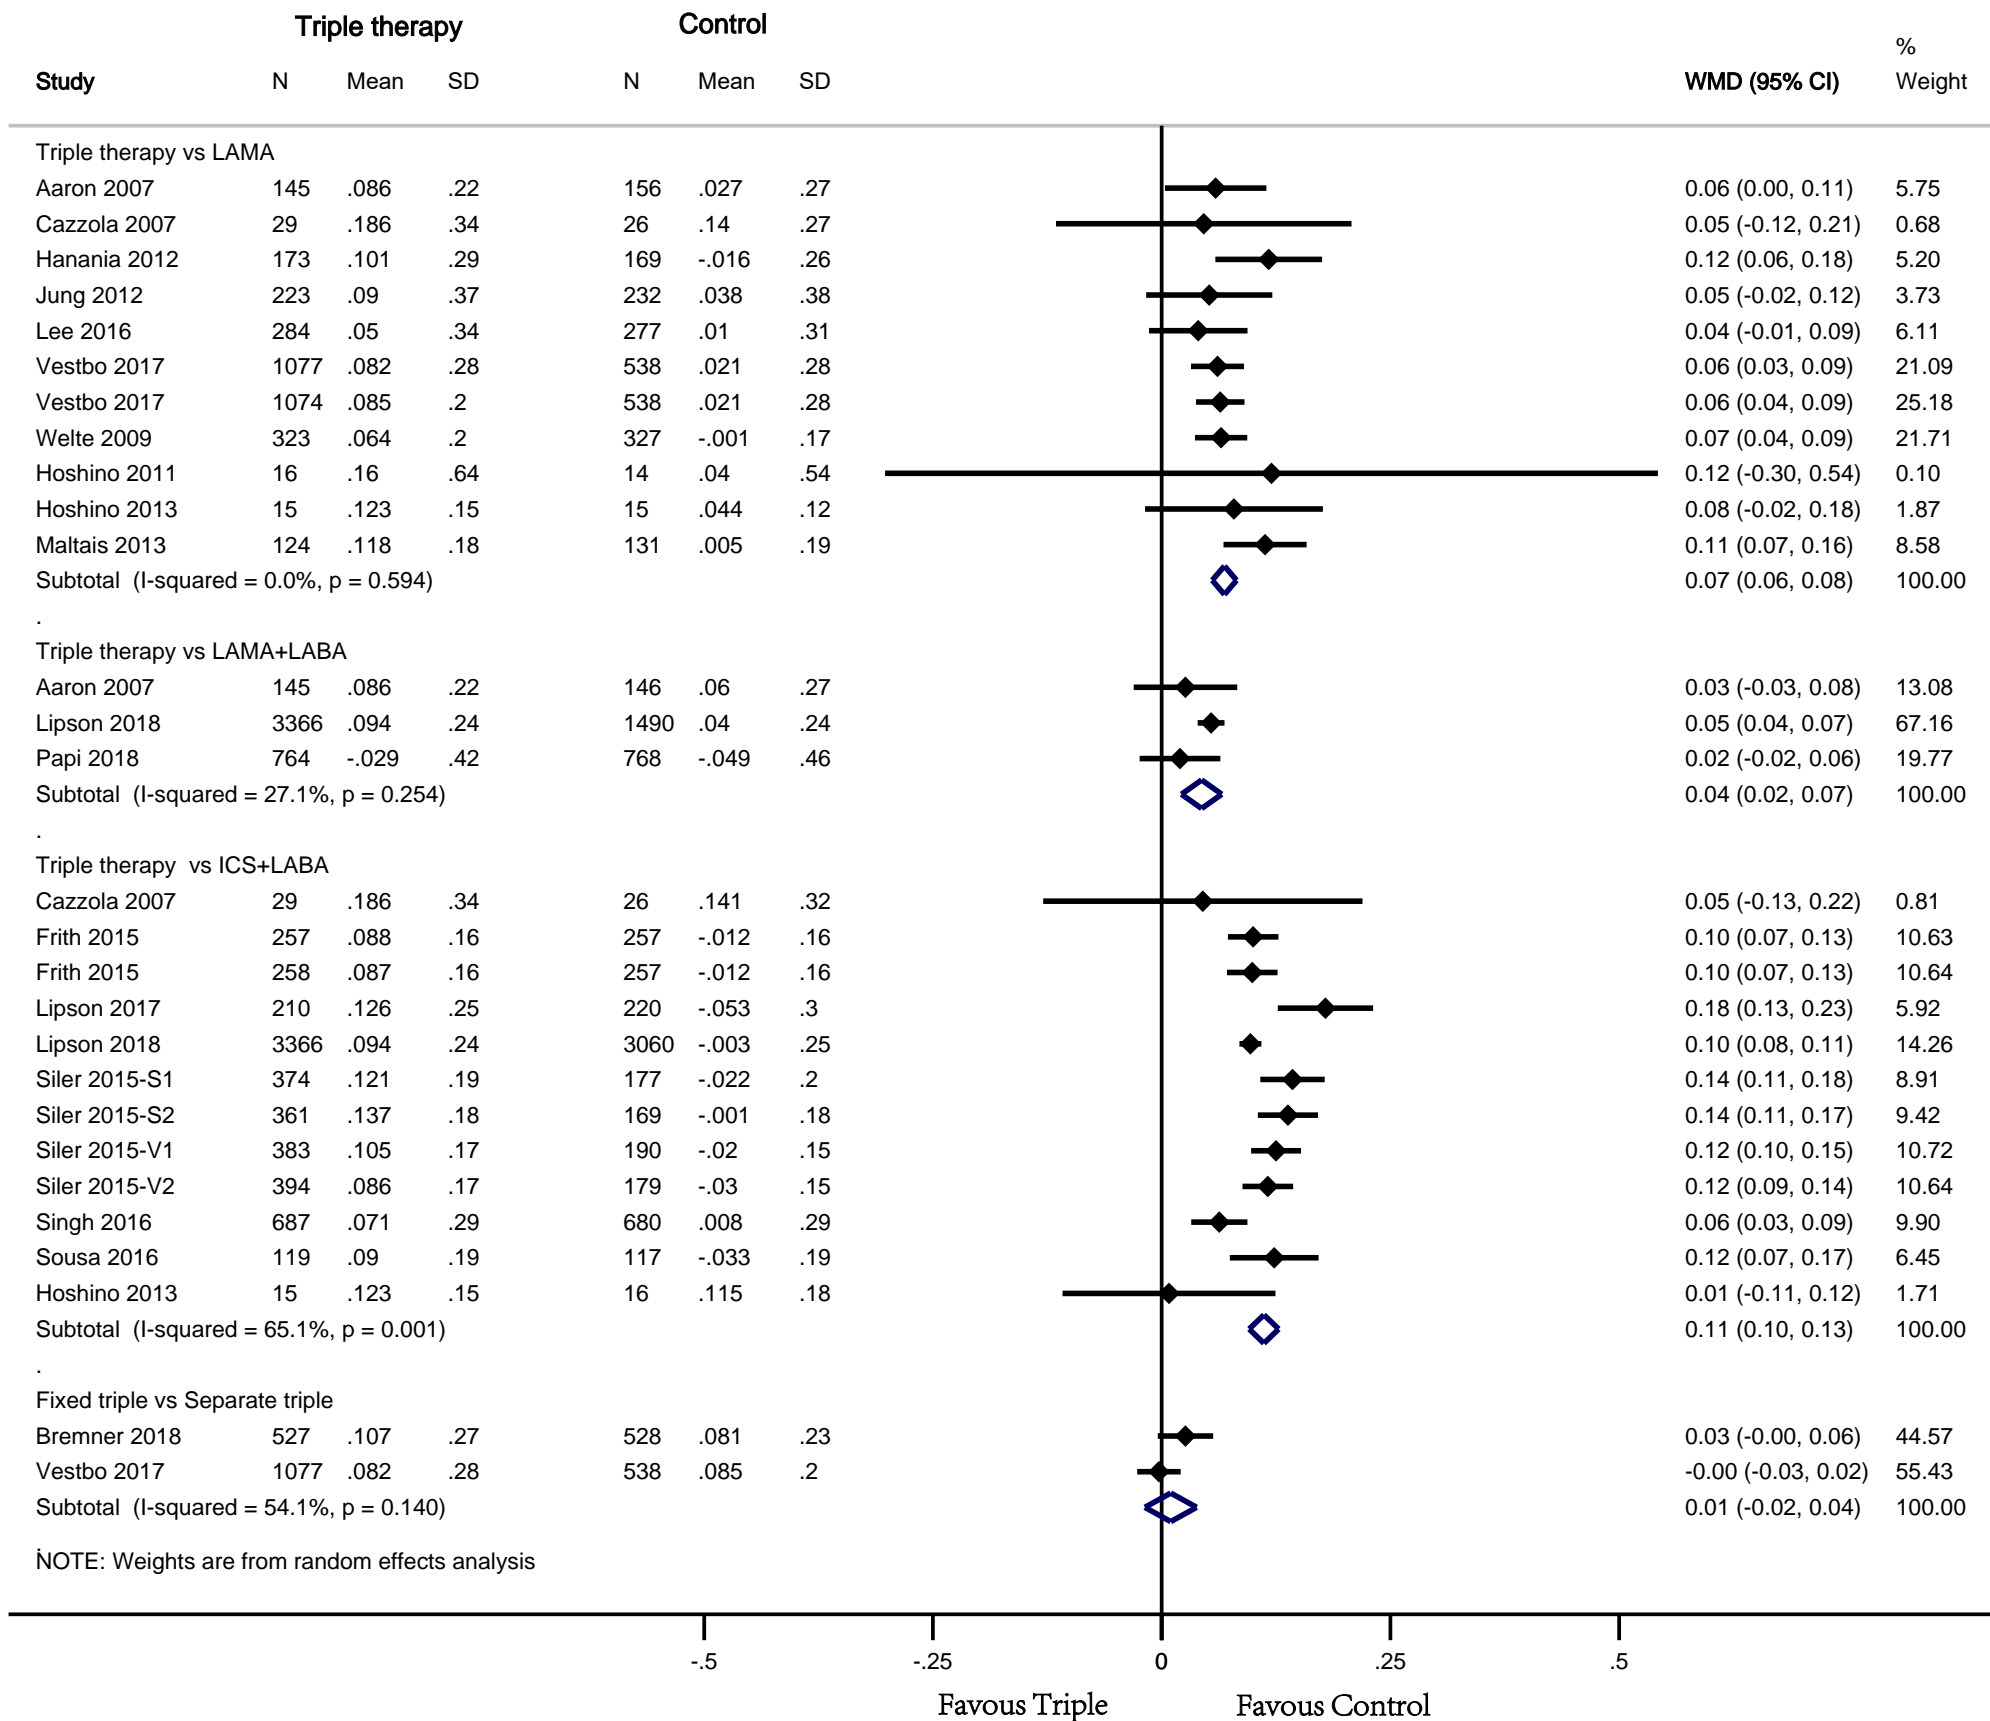

eFigure 2D Association of triple therapy with SGRQ score

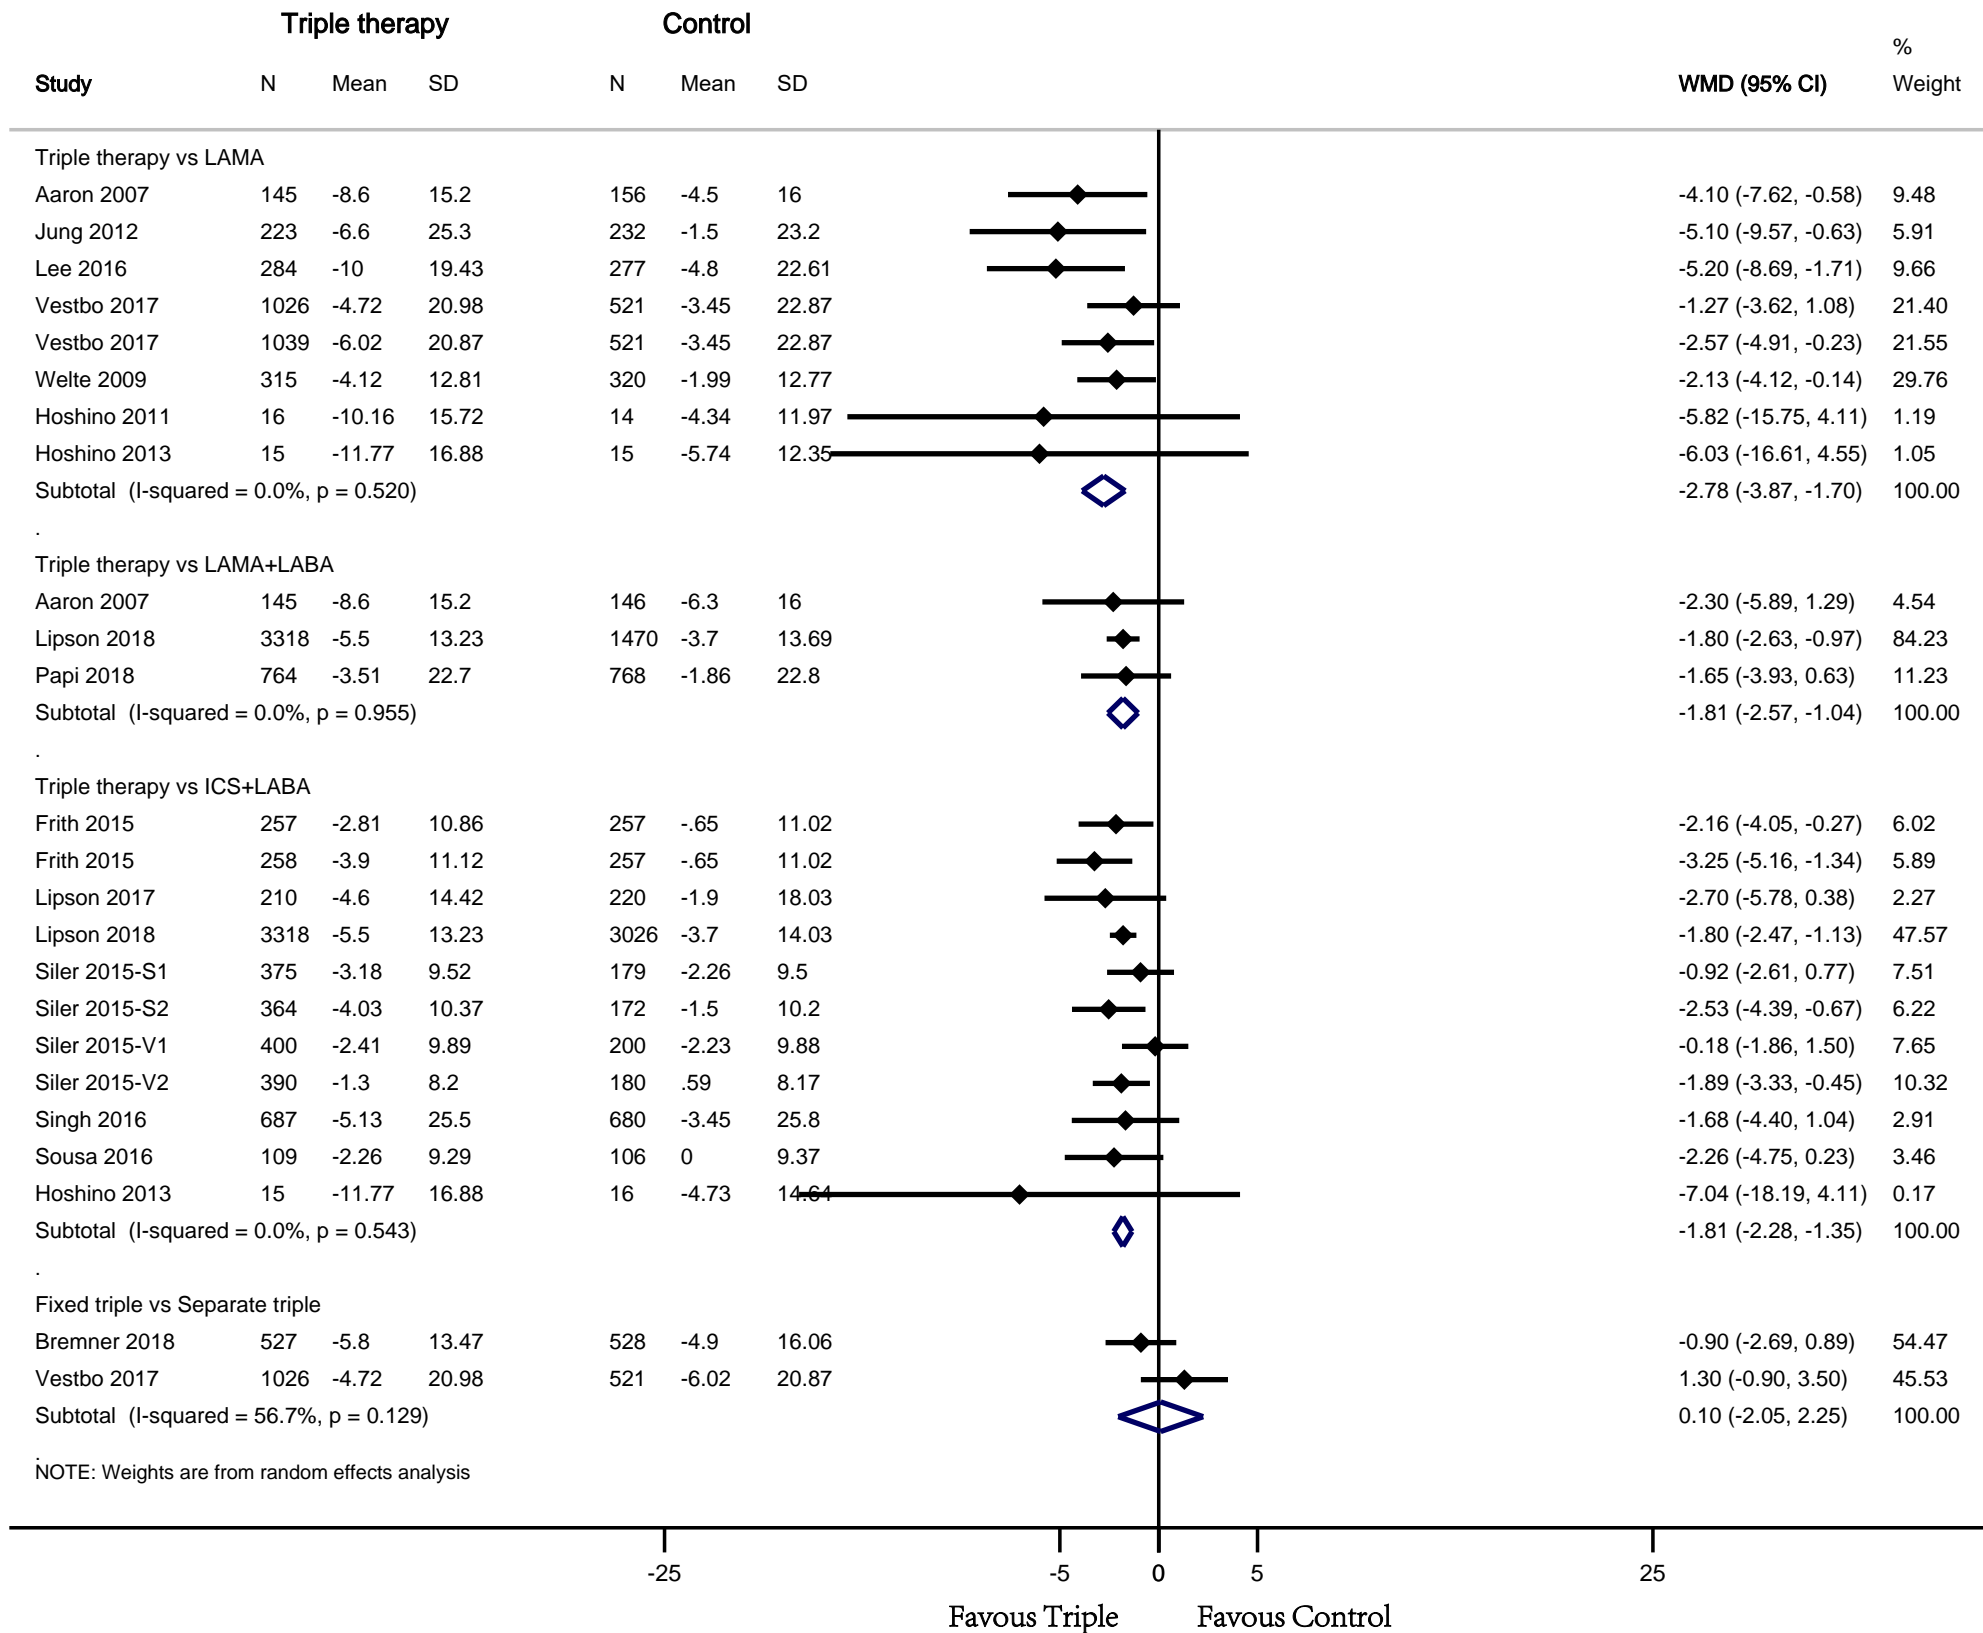

eFigure 3. Association of triple therapy with AEs

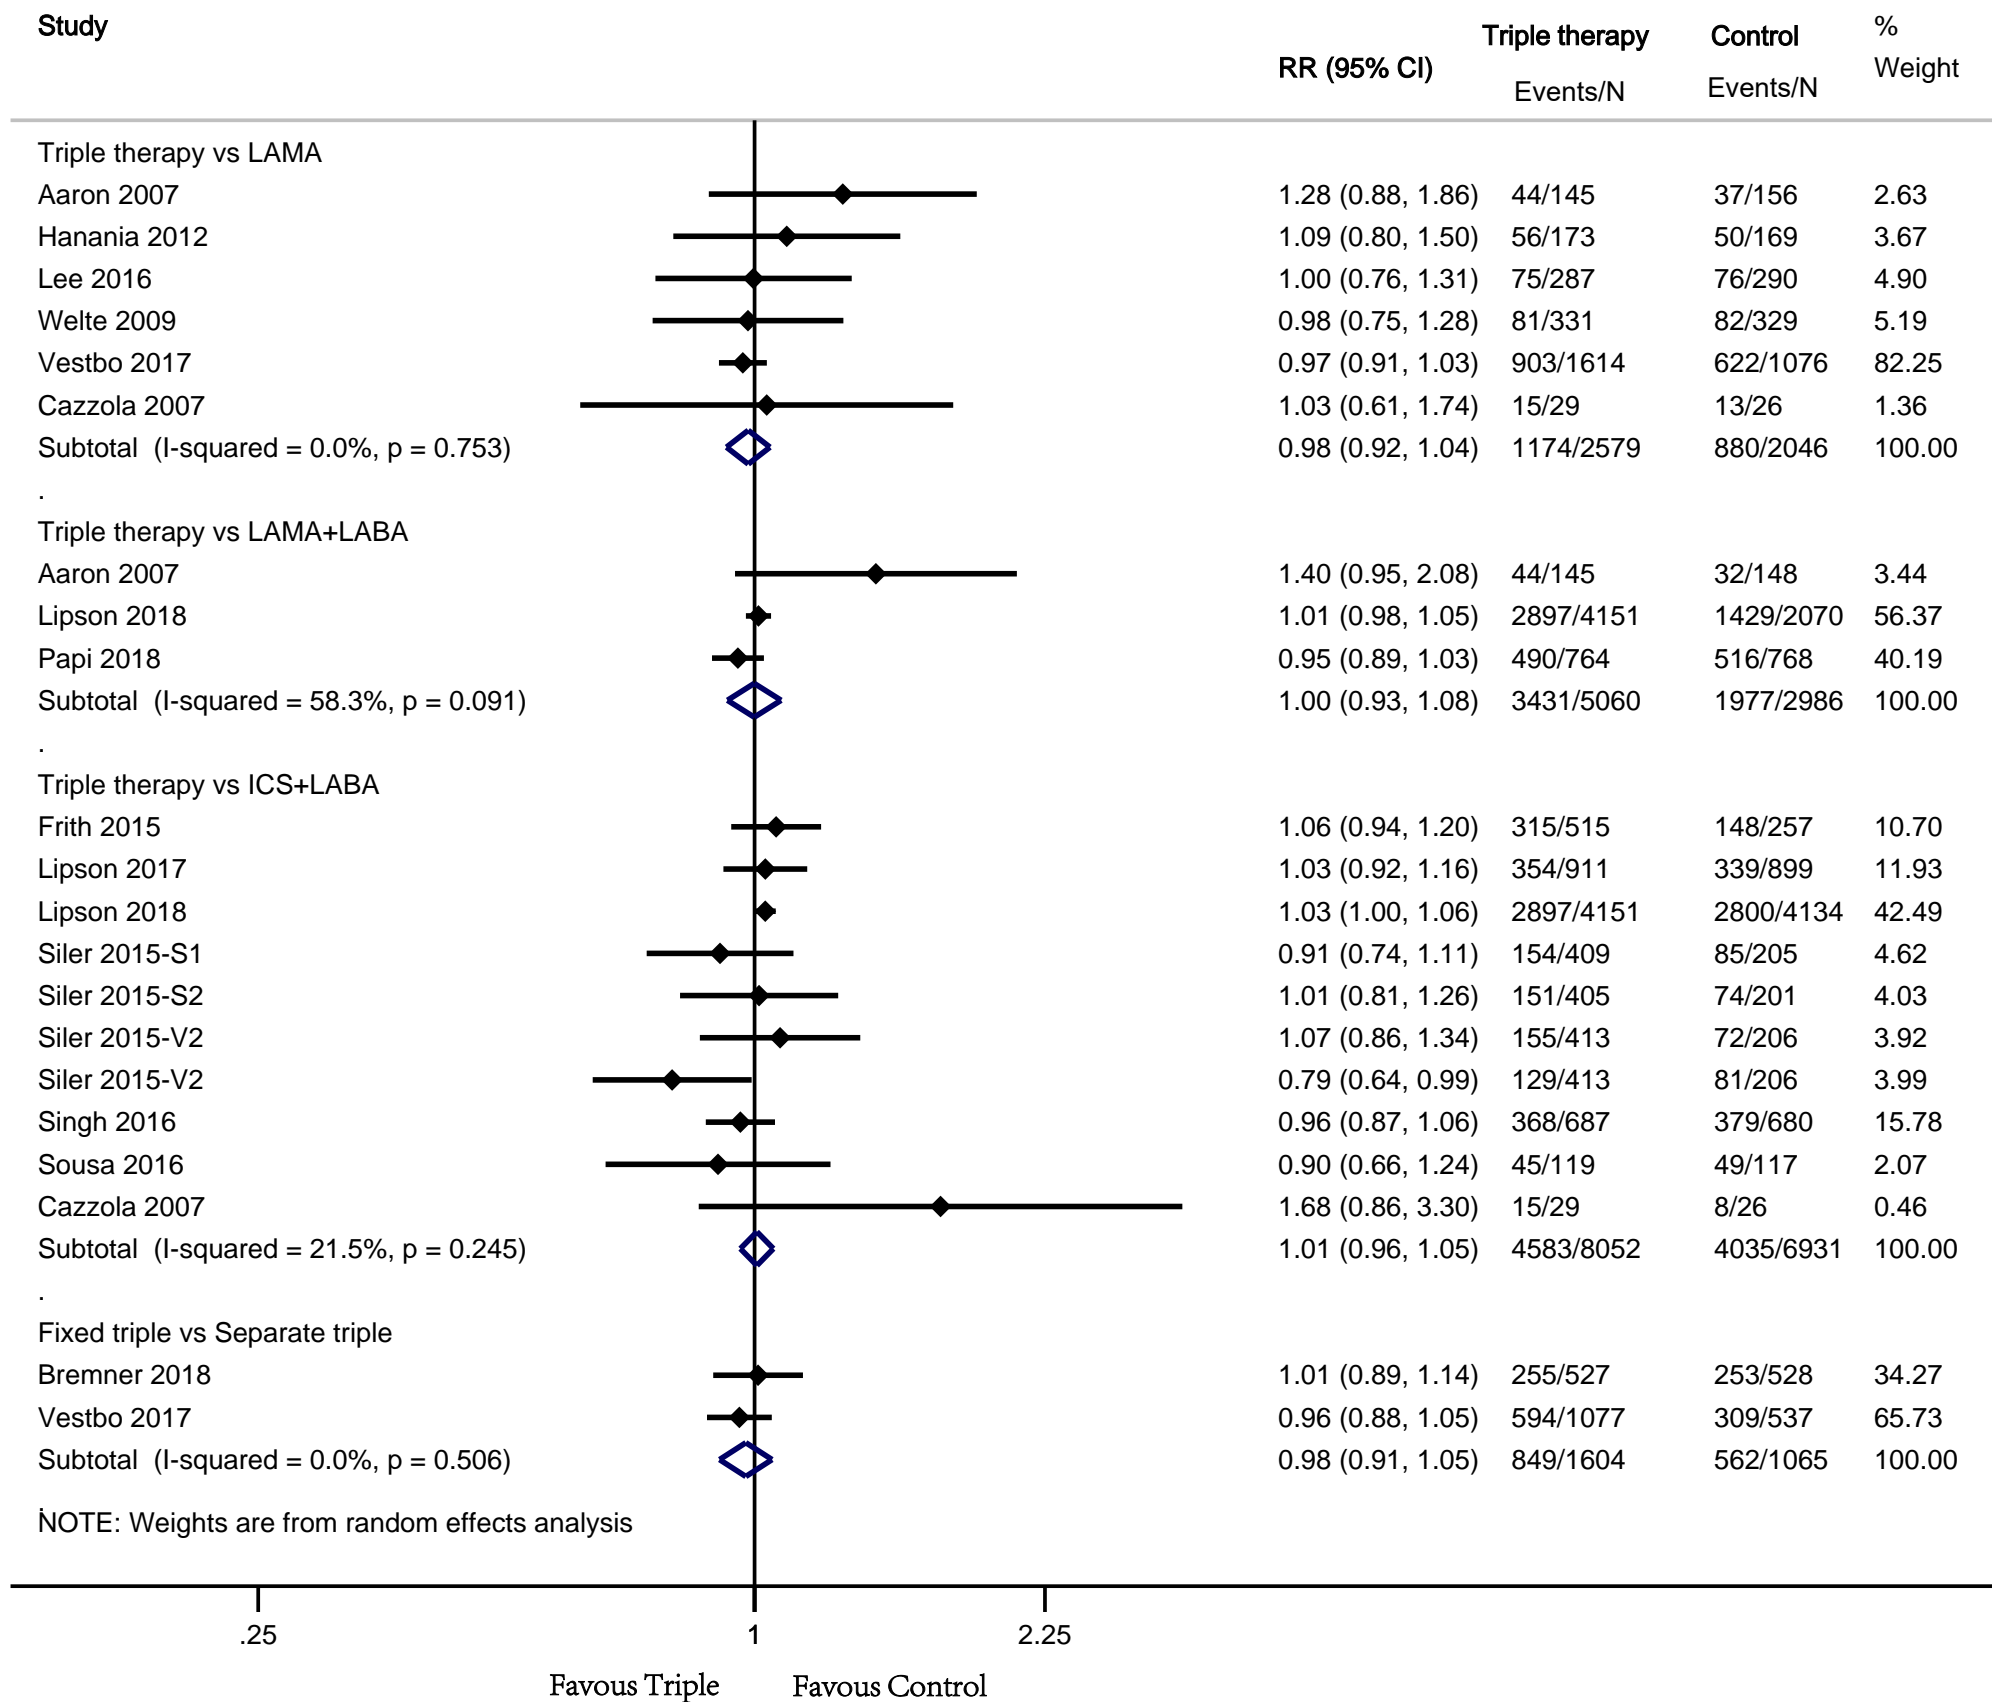

eFigure 4. Association of triple therapy with SAEs

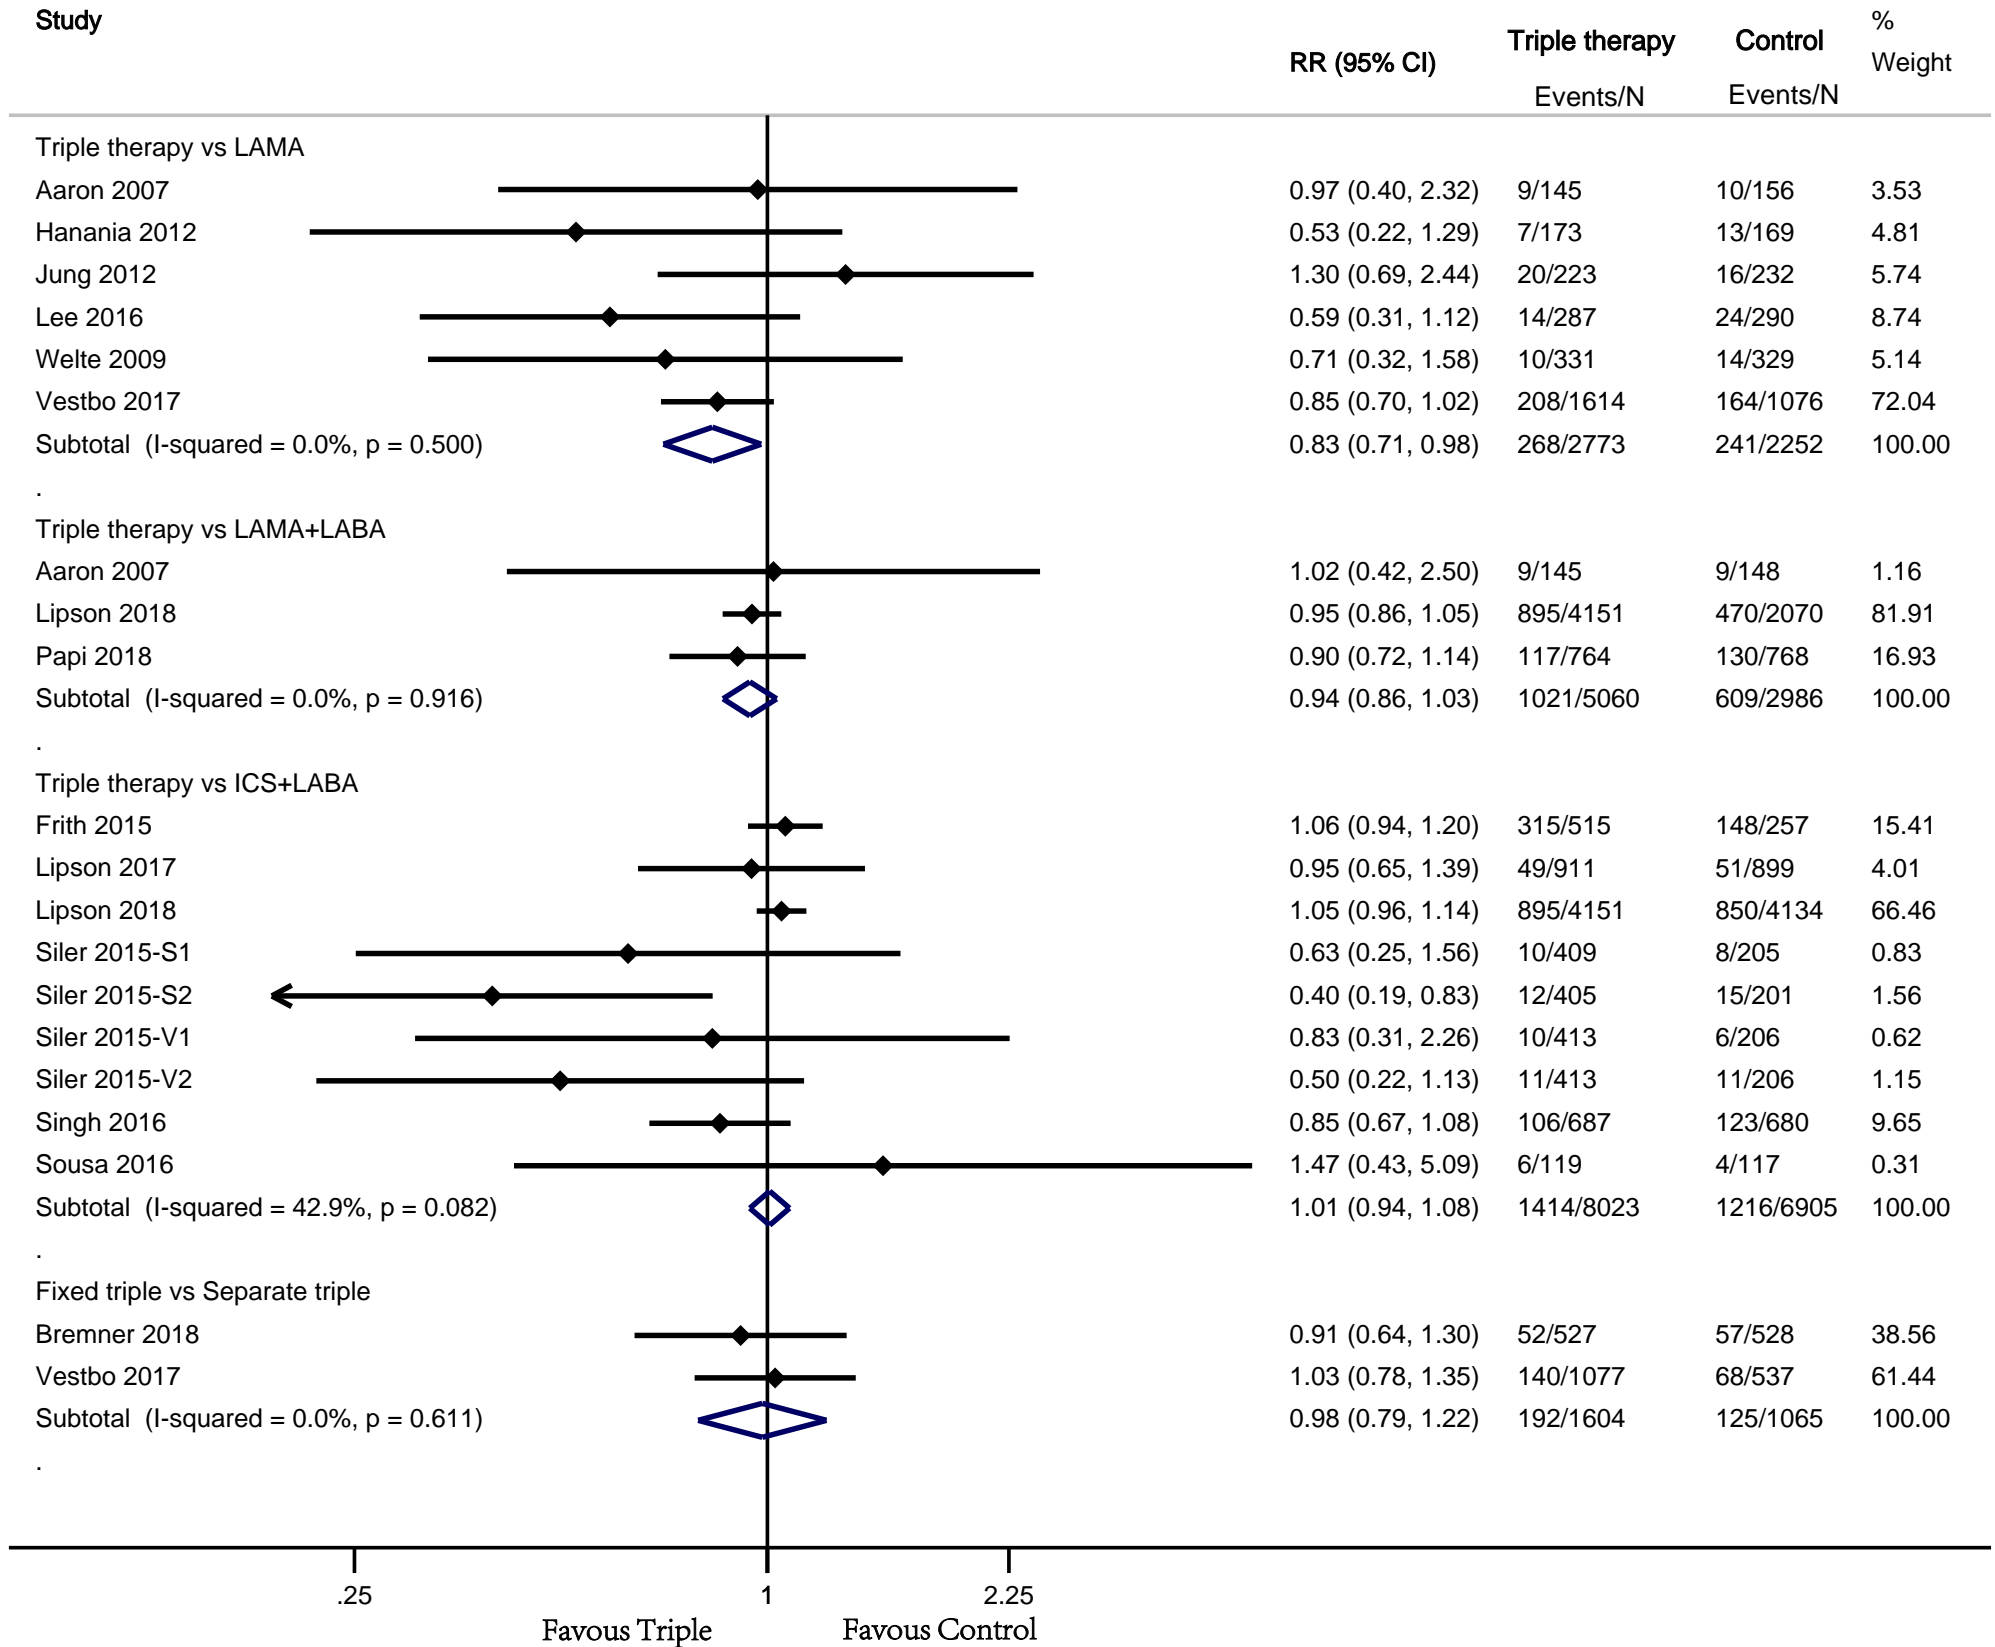

eFigure 5. Association of triple therapy with cardiovascular events

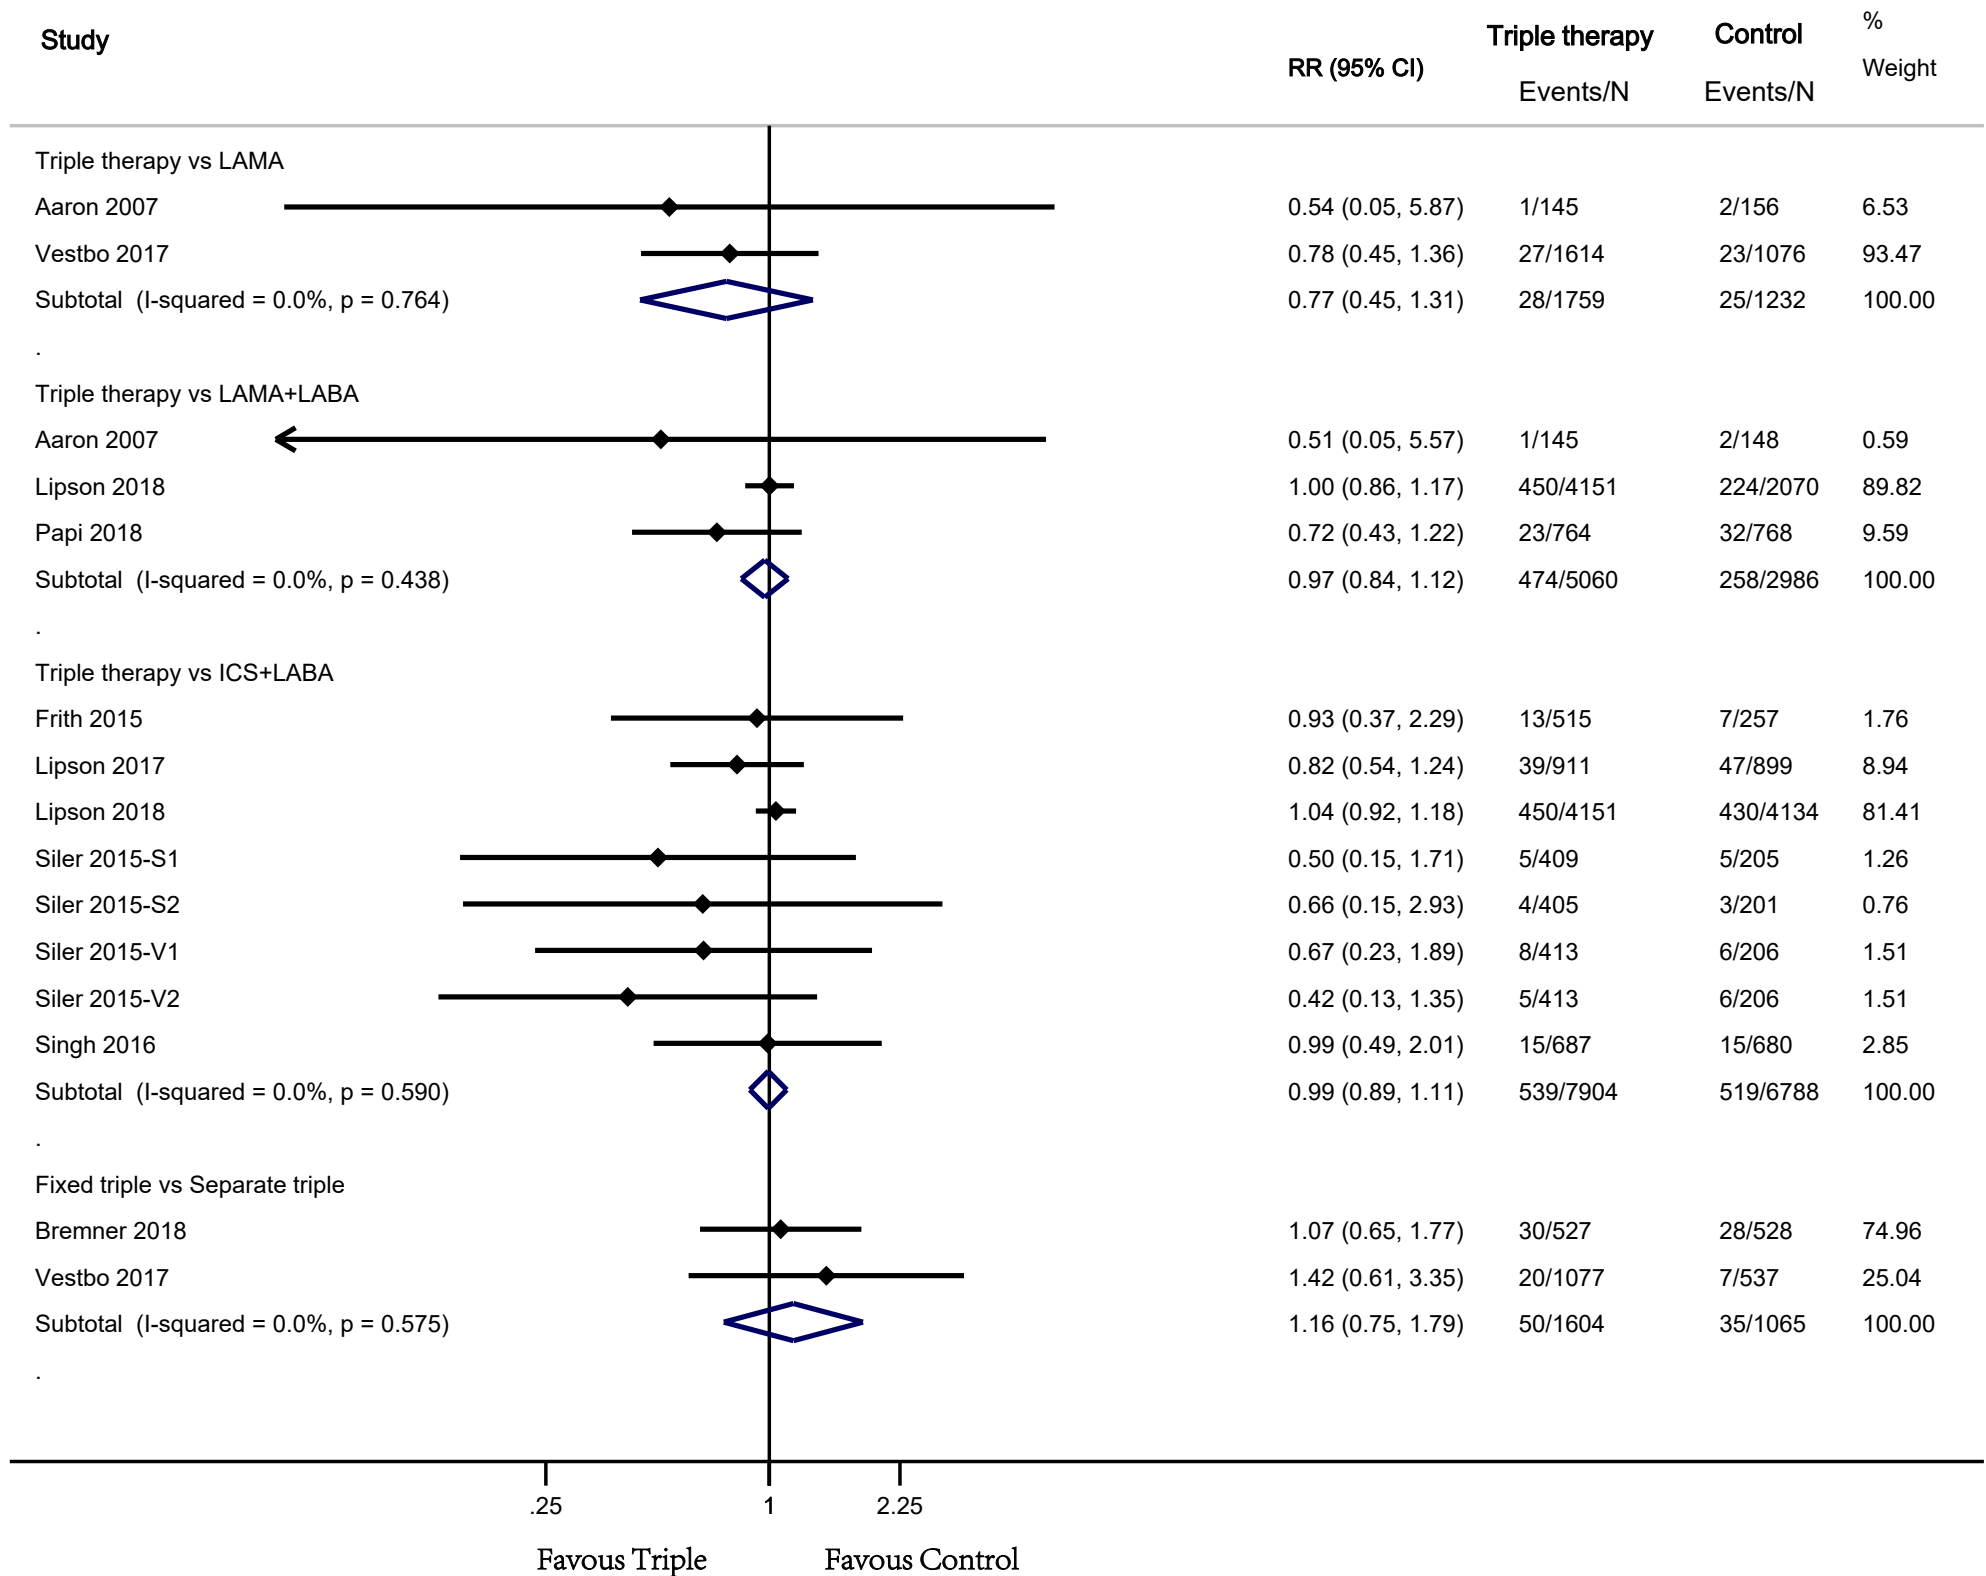

eFigure 6. Association of triple therapy with pneumonia events

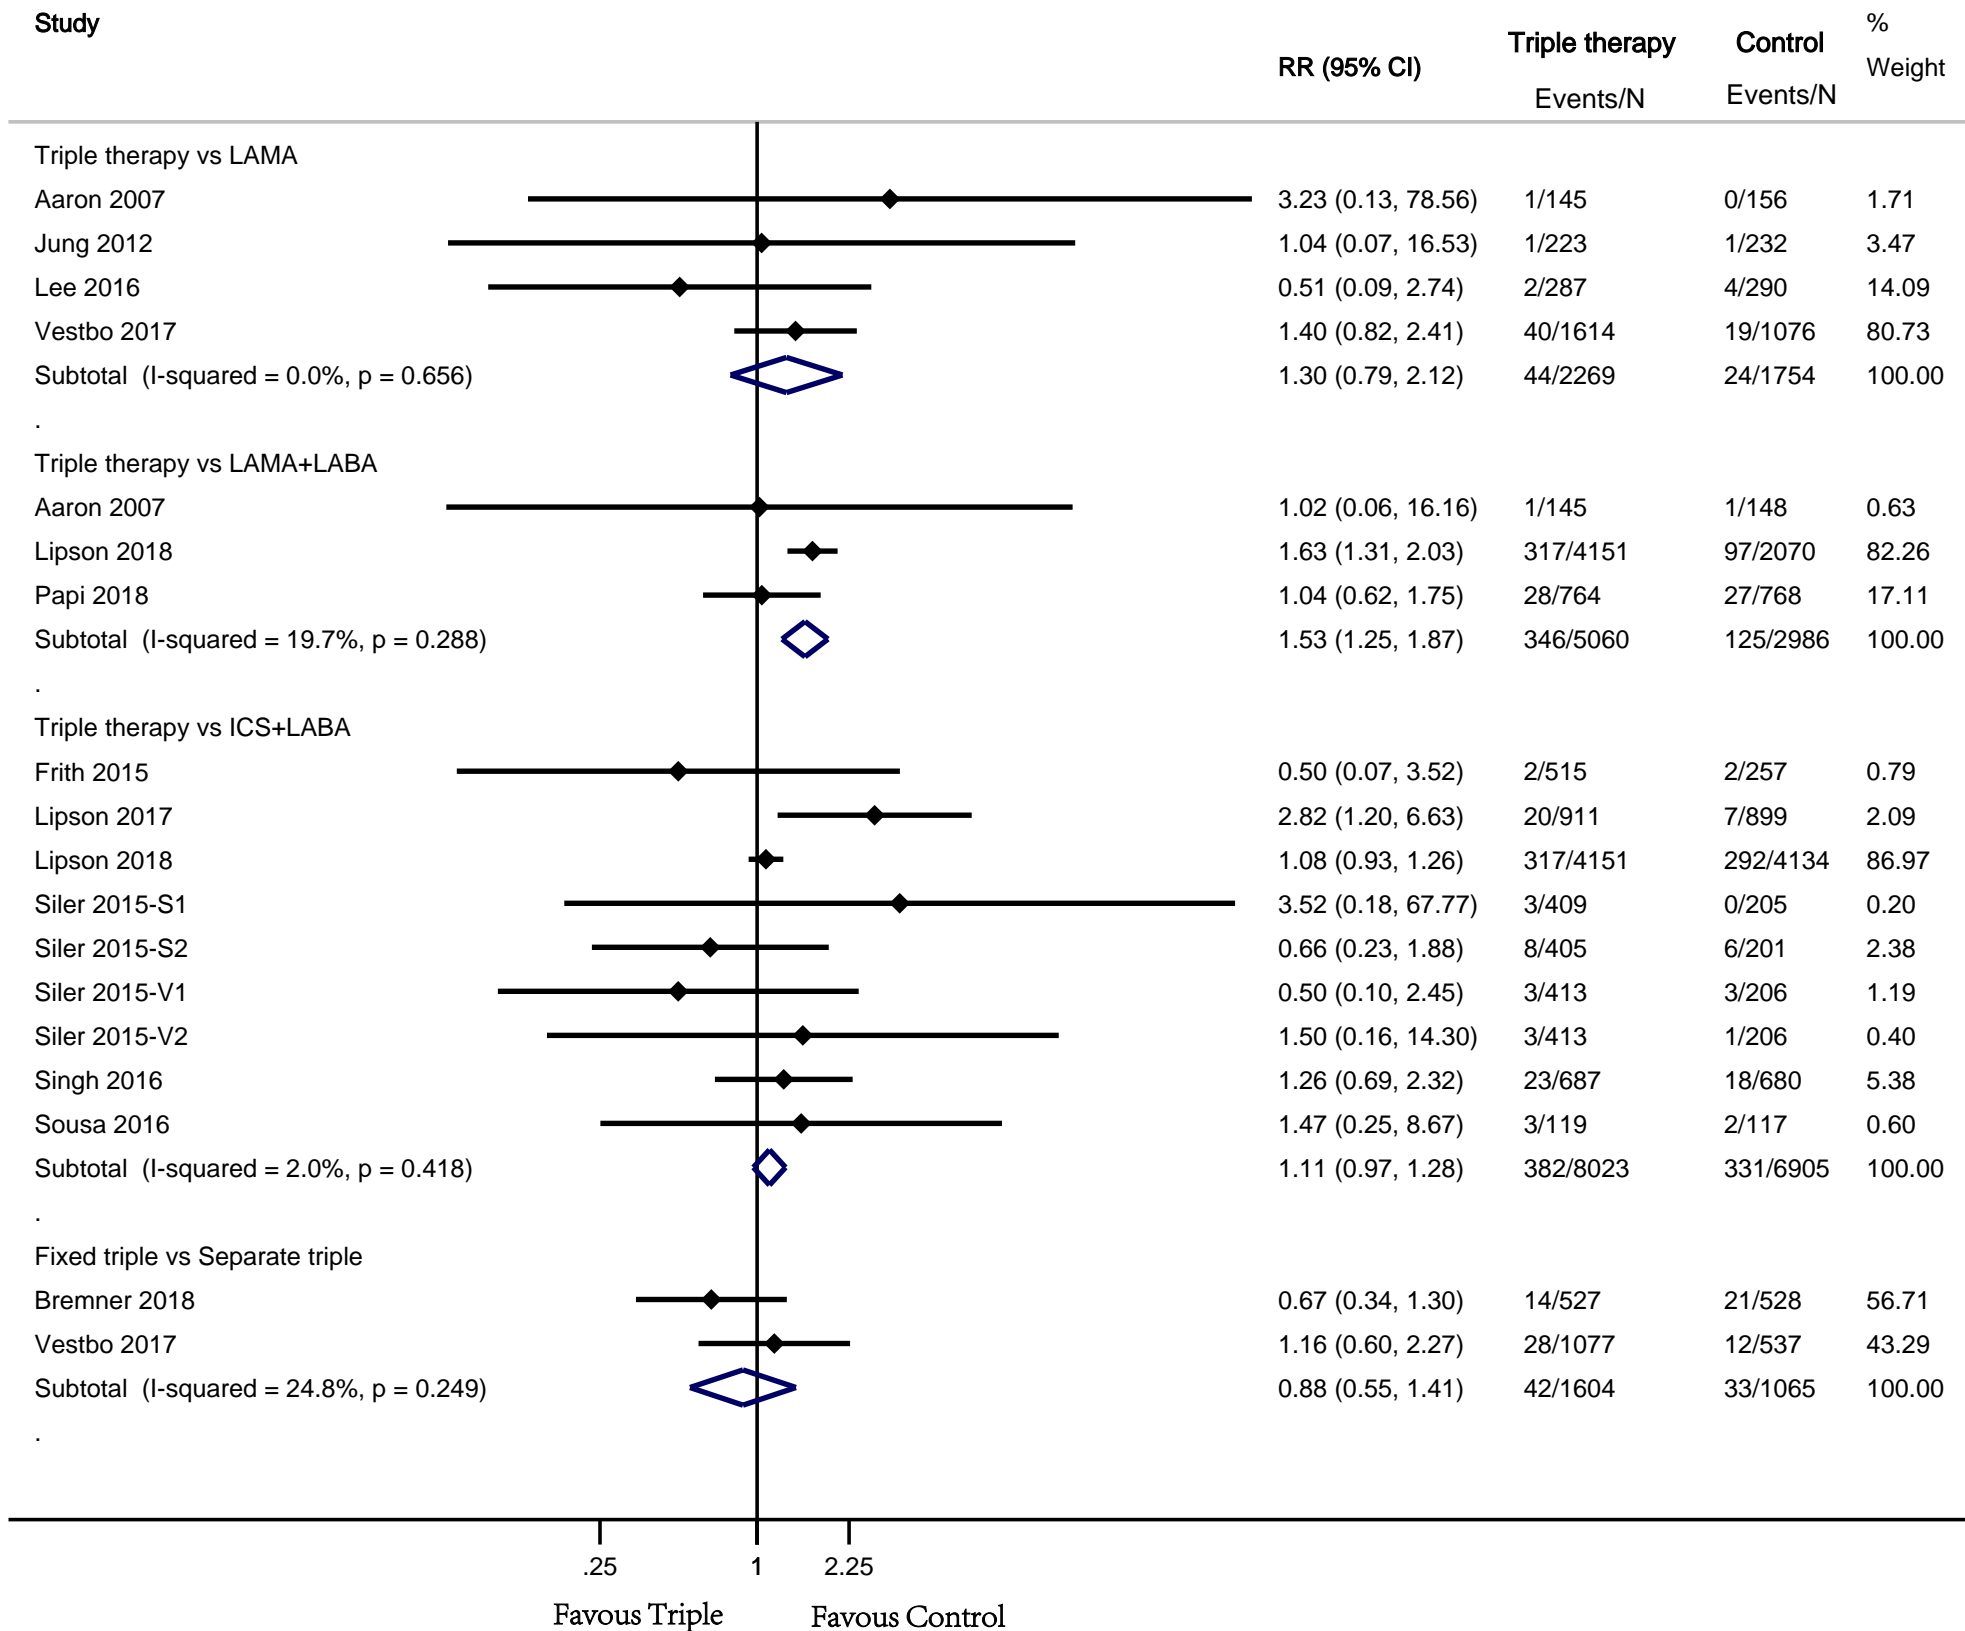

**eFigure 7A. Funnel plot of the included studies: triple therapy vs ICS/LABA on the risk of moderate to severe exacerbations.**

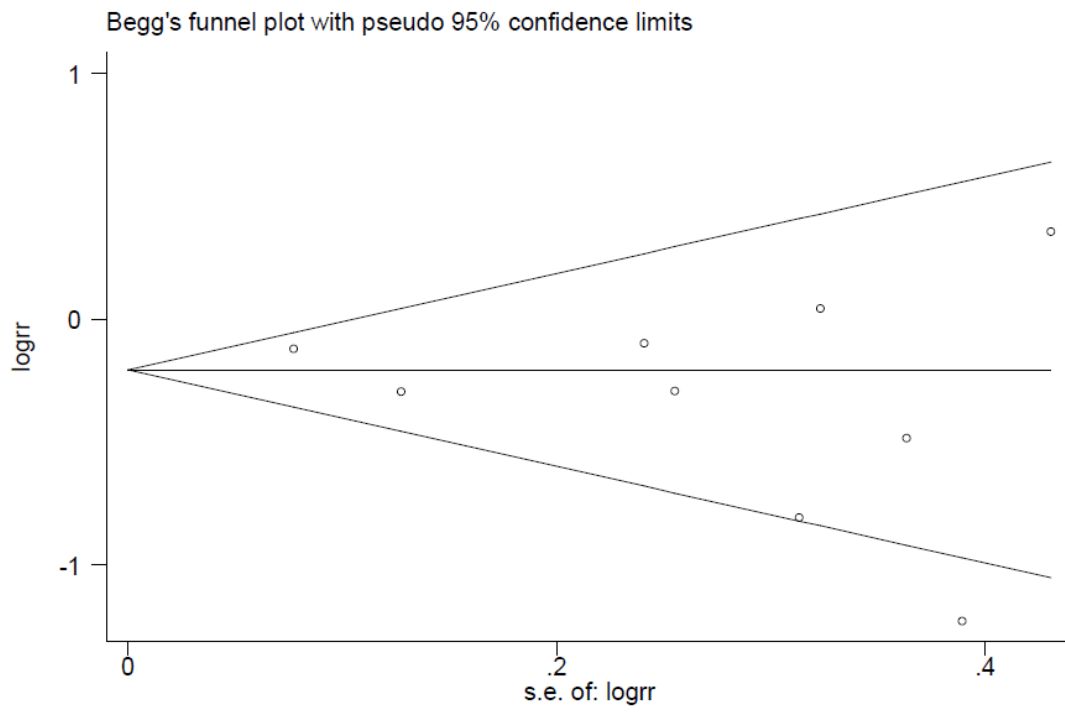



**eFigure 7B. Funnel plot of the included studies: triple therapy vs ICS/LABA on the risk of death.**

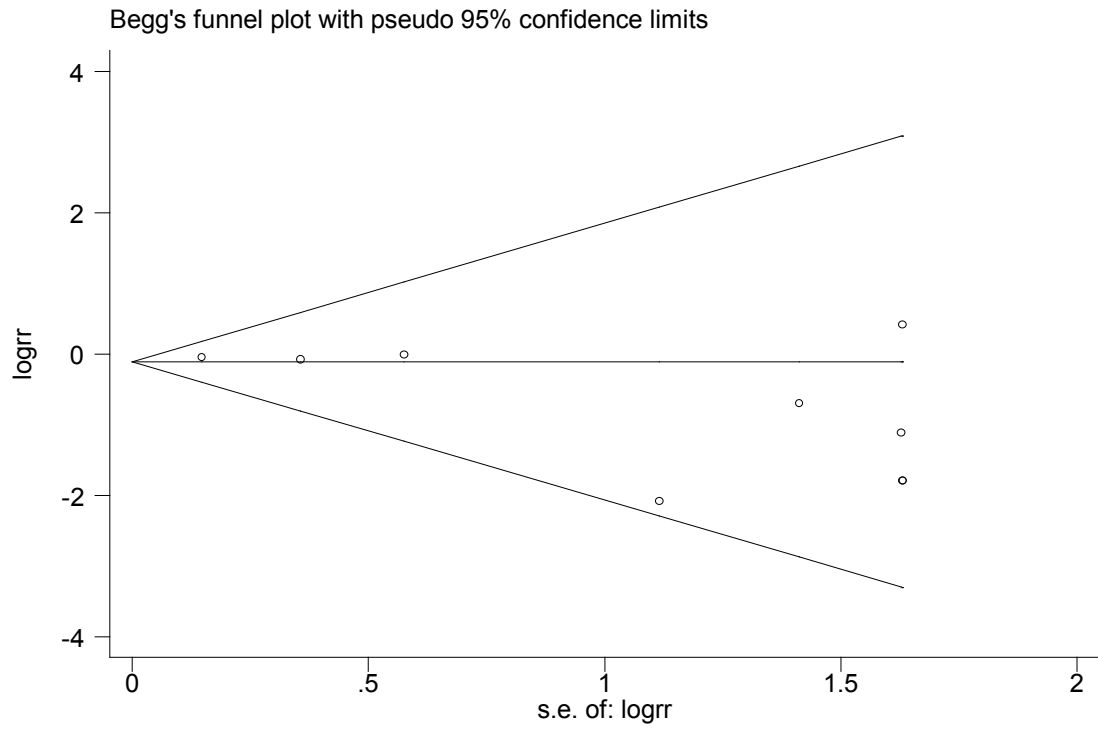

**eFigure 7C. Funnel plot of the included studies: triple therapy vs ICS/LABA on the risk of AEs.**

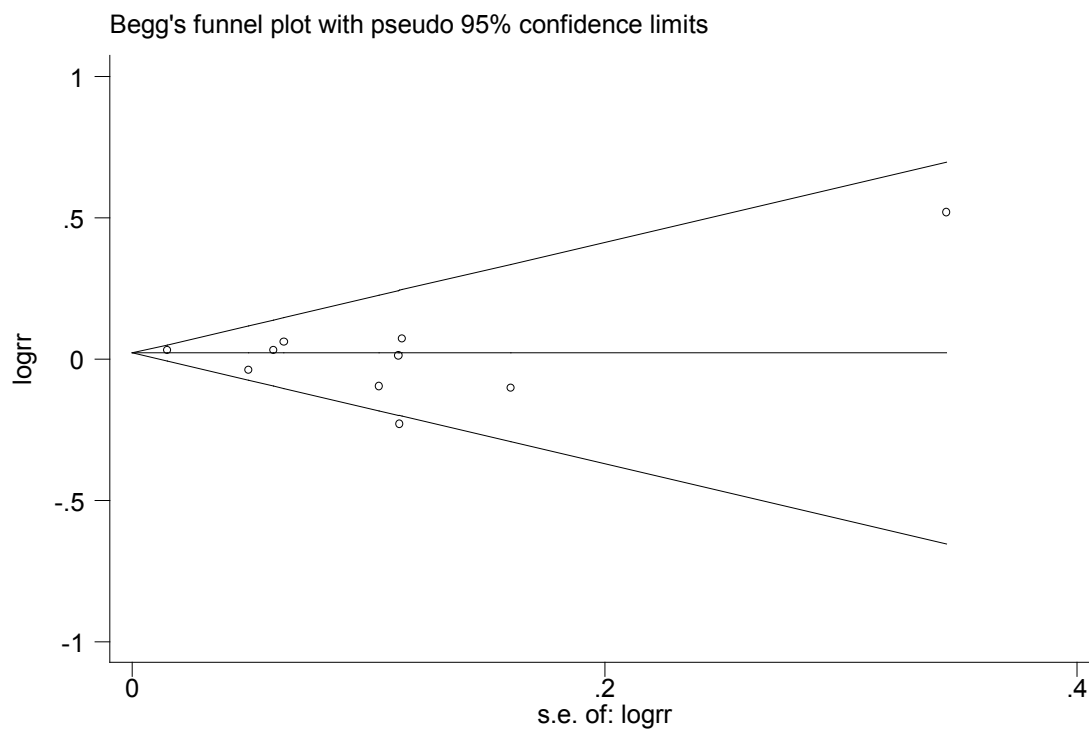

**eFigure 7D. Funnel plot of the included studies: triple therapy vs ICS/LABA on the risk of SAEs.**

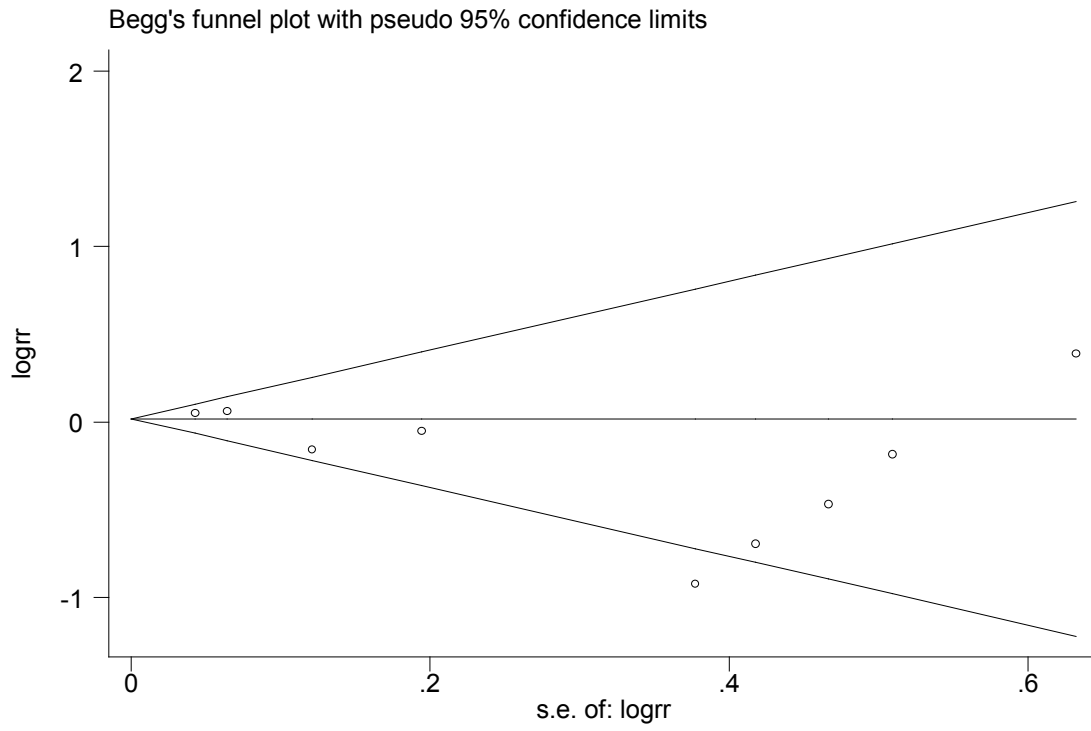

**eFigure 7E. Funnel plot of the included studies: triple therapy vs ICS/LABA on the risk of pneumonia.**

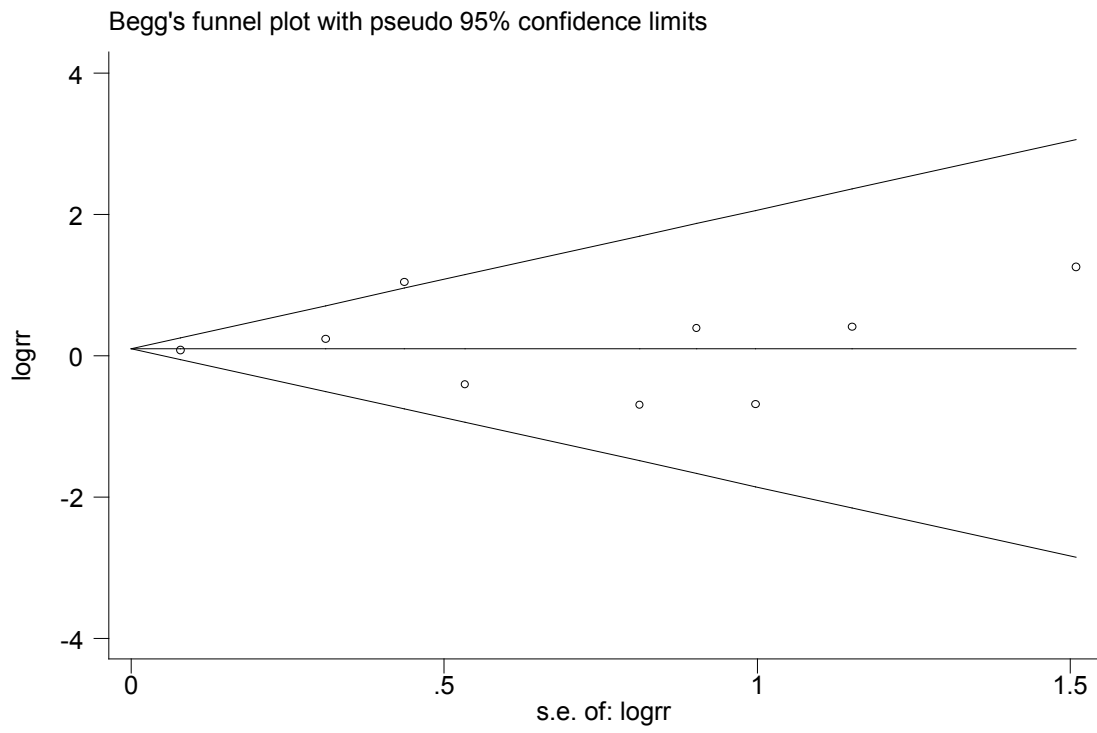

**eFigure 7F. Funnel plot of the included studies: triple therapy vs ICS/LABA on the change of FEV1.**

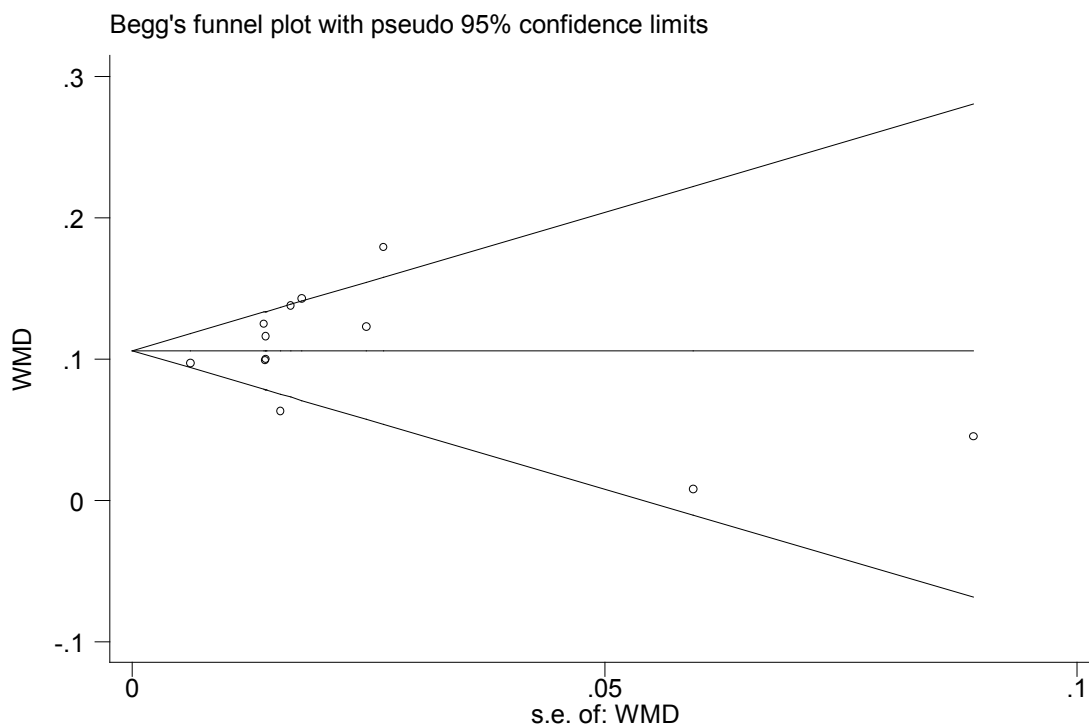

**eFigure 7G. Funnel plot of the included studies: triple therapy vs ICS/LABA on the change of SERQ score.**

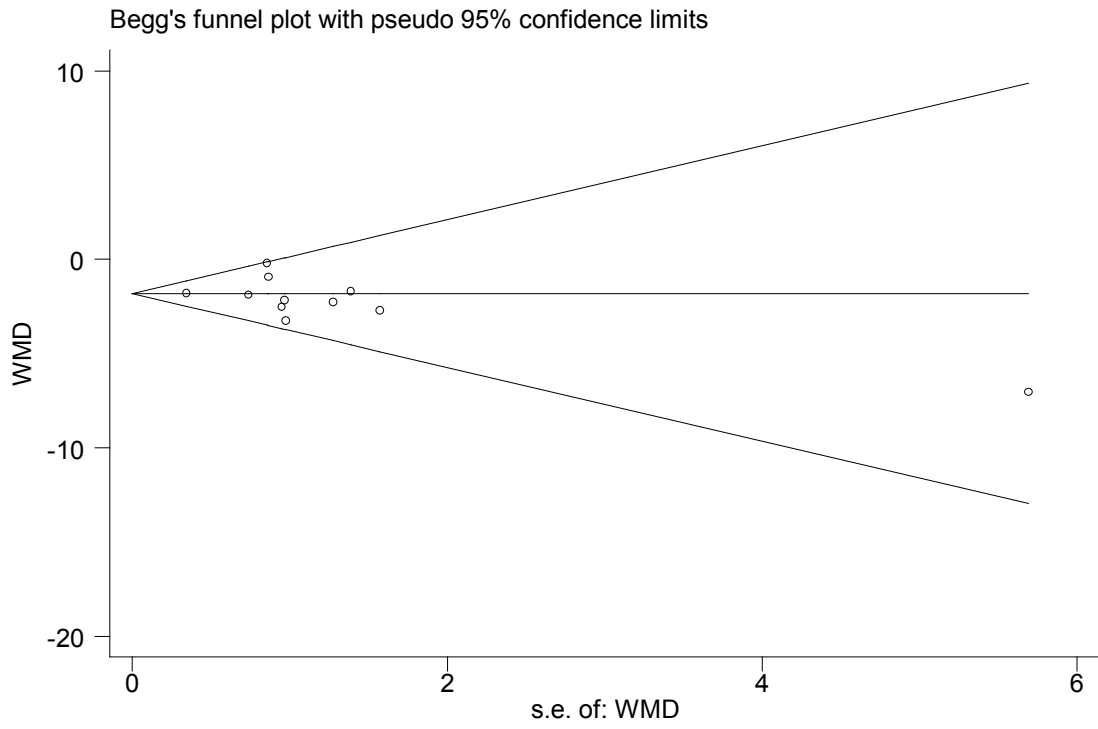

**eFigure 7H. Funnel plot of the included studies: triple therapy vs LAMA on the change of FEV1.**

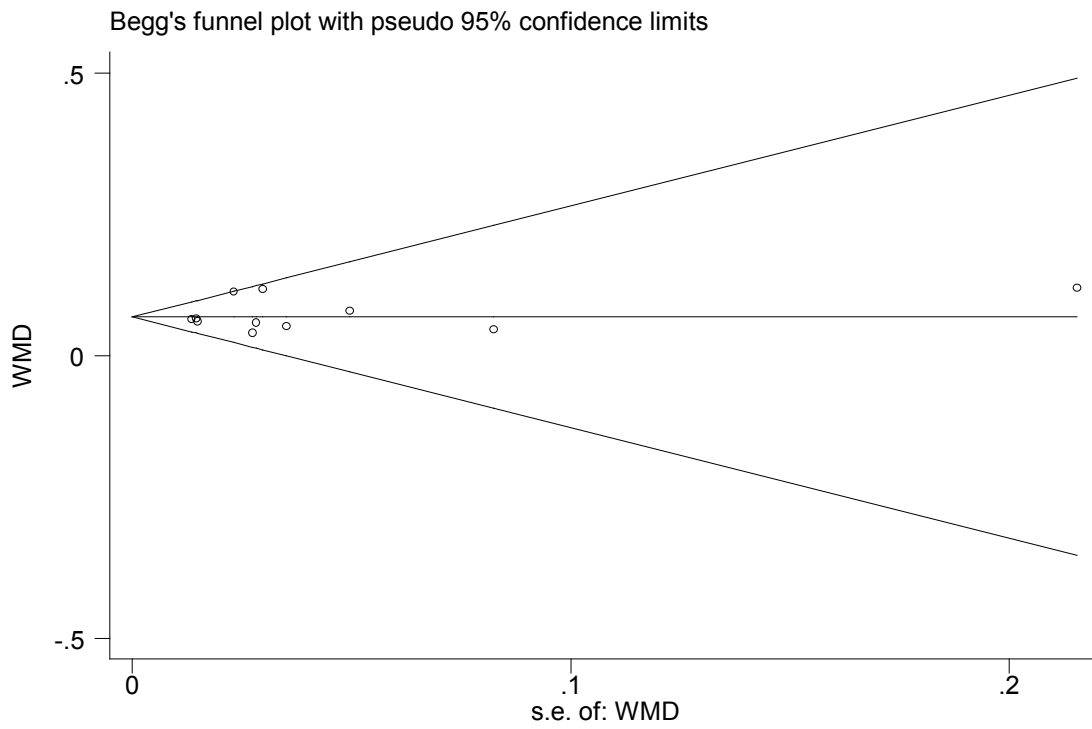

Supplement: zhey045538.ww.pdf [file zhey045538.ww.pdf]
